# Supplementary material for: Pairwise Correlation Analysis of the Alzheimer’s Disease Neuroimaging Initiative (ADNI) Dataset Reveals Significant Feature Correlation
Source: MDPI journal article supplement (doi:10.3390/genes12111661), 2021-10-21
Supplement: s1 [file s1]

## **Supplemental Material: Pairwise Correlation Analysis of the Alzheimer's Disease Neuroimaging Initiative (ADNI) Dataset Reveals Significant Feature Correlation**

Erik D. Huckvale<sup>1</sup>, Matthew W. Hodgman<sup>1</sup>, Brianna B. Greenwood<sup>2</sup>, Deborah O. Stucki<sup>2</sup>, Katrisa Ward<sup>2</sup>, Mark T.W. Ebbert<sup>1</sup>, John S.K. Kauwe<sup>2</sup>, for the Alzheimer's Disease Neuroimaging Initiative<sup>+</sup>, Justin B. Miller<sup>1,\*</sup>,

<sup>1</sup>Sanders-Brown Center on Aging, University of Kentucky, Lexington, KY 40536, USA

<sup>2</sup>Department of Biology, Brigham Young University, Provo, UT 84602, USA

\*Corresponding author: [justin.miller@uky.edu](mailto:justin.miller@uky.edu)

<sup>+</sup>Data used in preparation of this article were obtained from the Alzheimer's Disease Neuroimaging Initiative (ADNI) database ([adni.loni.usc.edu](http://adni.loni.usc.edu)). As such, the investigators within the ADNI contributed to the design and implementation of ADNI and/or provided data but did not participate in analysis or writing of this report. A complete listing of ADNI investigators can be found at: [http://adni.loni.usc.edu/wp-content/uploads/how\\_to\\_apply/ADNI\\_Acknowledgement\\_List.pdf](http://adni.loni.usc.edu/wp-content/uploads/how_to_apply/ADNI_Acknowledgement_List.pdf)

Table of Contents

*Supplementary Figures* ..... 3

    Figure S1 – Steps for Creating The Raw Data Set for the ADNIMERGE Domain.....3

    Figure S2 – Diagram Displaying the Creation of the Convolutional Autoencoders .....4

*Supplementary Tables* ..... 5

    Table S1 – Significant Comparison Frequencies For Features By Bonferroni Alpha (ADNIMERGE Features Only).....5

    Table S2 – Significant Comparison Frequencies For Features By Maximum Alpha (ADNIMERGE Features Only).....35

    Table S3: Comparison Frequencies Of The Subset Analysis (Male Subset) .....44

    Table S4: Comparison Frequencies Of The Subset Analysis (Female Subset) .....44

    Table S5: Comparison Frequencies Of The Subset Analysis (CDR=0 Subset) .....45

    Table S6: Comparison Frequencies Of The Subset Analysis (CDR=0.5 Subset) .....45

    Table S7: Comparison Frequencies Of The Subset Analysis (CDR≥1.0 Subset) .....46

    Table S8– Maximally-significant correlations with sufficient data to perform subsetting: Males.....46

    Table S9– Maximally-significant correlations with sufficient data to perform subsetting: Females .....46

    Table S10– Maximally-significant correlations with sufficient data to perform subsetting: CDR=0 .....47

    Table S11– Maximally-significant correlations with sufficient data to perform subsetting: CDR=0.5 .....47

    Table S12– Maximally-significant correlations with sufficient data to perform subsetting: CDR≥1.0 .....47

    Table S13 – Resource Usage .....48

## Supplementary Figures

Figure S1 – Steps for Creating The Raw Data Set for the ADNIMERGE Domain

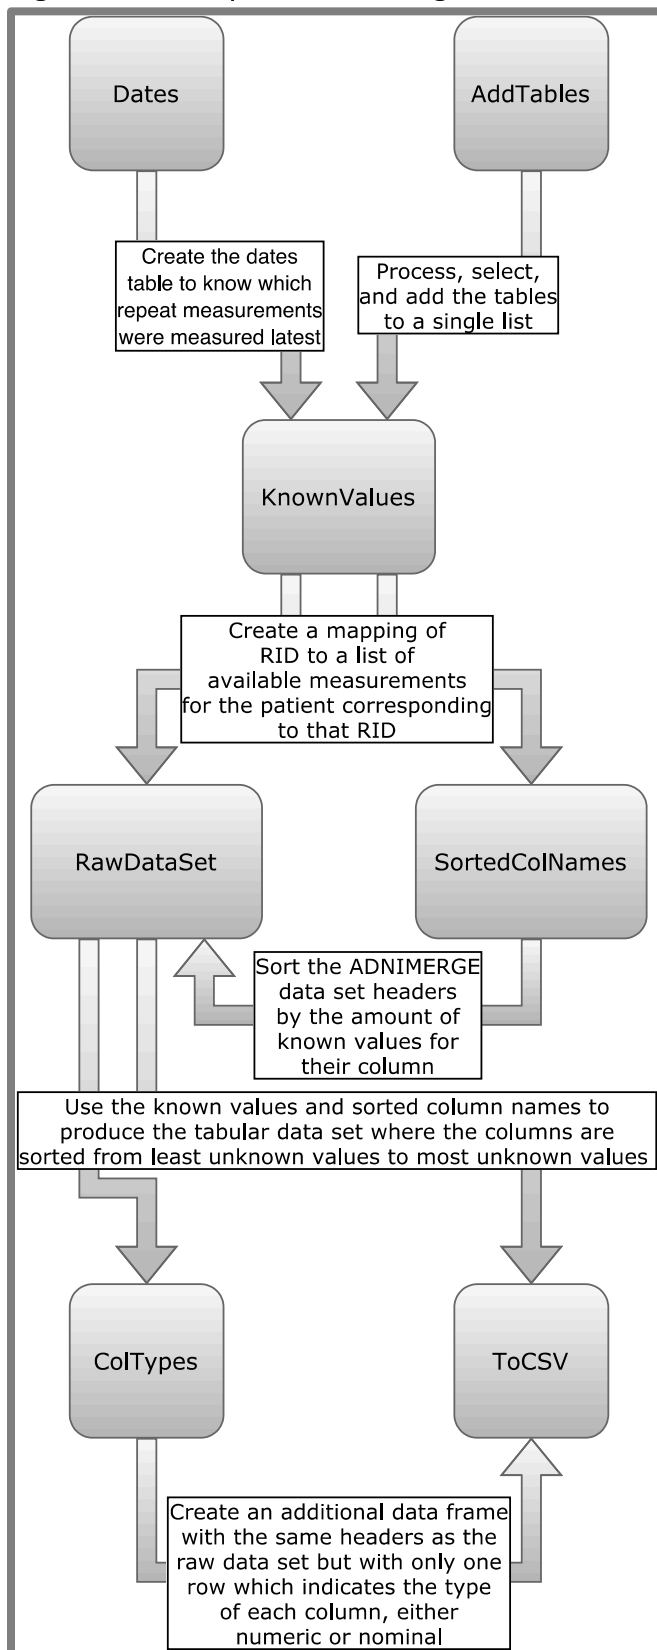

Figure S2 – Diagram Displaying the Creation of the Convolutional Autoencoders

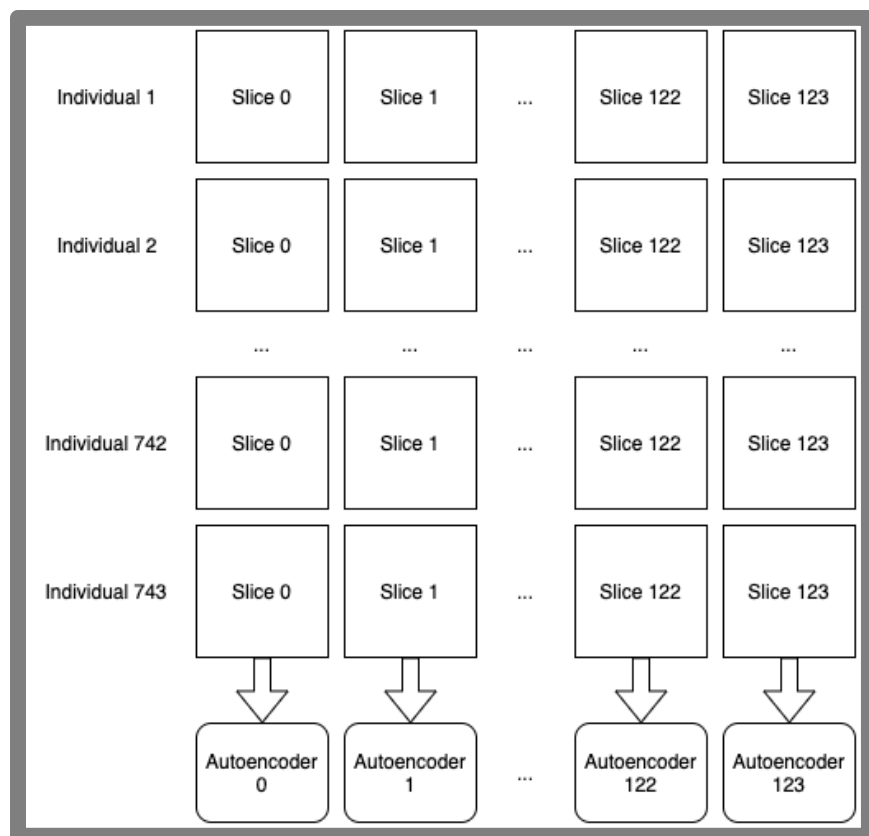

## Supplementary Tables

Table S1 – Significant Comparison Frequencies For Features By Bonferroni Alpha (ADNIMERGE Features Only)

| Feature            | ADNIMERGE Frequency | Gene Expression Frequency | MRI Frequency | Total Frequency | Domain    |
|--------------------|---------------------|---------------------------|---------------|-----------------|-----------|
| PTGENDER           | 207                 | 281                       | 145780        | 146268          | ADNIMERGE |
| ST10CV             | 262                 | 85                        | 143377        | 143724          | ADNIMERGE |
| ICV                | 265                 | 84                        | 141676        | 142025          | ADNIMERGE |
| ICV.BL             | 265                 | 84                        | 141676        | 142025          | ADNIMERGE |
| QCTYPE             | 213                 | 0                         | 114599        | 114812          | ADNIMERGE |
| FSVERSION          | 213                 | 0                         | 114599        | 114812          | ADNIMERGE |
| EVENT              | 209                 | 0                         | 109326        | 109535          | ADNIMERGE |
| INCLUSION          | 208                 | 0                         | 108130        | 108338          | ADNIMERGE |
| COLPROT            | 215                 | 3                         | 107022        | 107240          | ADNIMERGE |
| ORIGPROT           | 215                 | 3                         | 107022        | 107240          | ADNIMERGE |
| ENROLLED           | 215                 | 3                         | 107022        | 107240          | ADNIMERGE |
| CLOCKNUM           | 199                 | 0                         | 97725         | 97924           | ADNIMERGE |
| COPYTIME           | 198                 | 0                         | 97030         | 97228           | ADNIMERGE |
| CLOCKSYM           | 216                 | 0                         | 96307         | 96523           | ADNIMERGE |
| CLOCKTIME          | 243                 | 0                         | 96043         | 96286           | ADNIMERGE |
| ST65SV             | 191                 | 46                        | 81250         | 81487           | ADNIMERGE |
| GLUCOSE            | 155                 | 0                         | 81245         | 81400           | ADNIMERGE |
| BRAINVOL           | 274                 | 58                        | 80547         | 80879           | ADNIMERGE |
| USERDATE           | 196                 | 0                         | 80393         | 80589           | ADNIMERGE |
| ARM                | 339                 | 0                         | 78446         | 78785           | ADNIMERGE |
| ILE                | 78                  | 60                        | 76698         | 76836           | ADNIMERGE |
| C13.PE.P.16.0.22.6 | 153                 | 0                         | 76085         | 76238           | ADNIMERGE |
| C13.PE.16.0.22.6   | 154                 | 0                         | 74416         | 74570           | ADNIMERGE |
| ST35SA             | 156                 | 60                        | 73101         | 73317           | ADNIMERGE |
| ST94SA             | 152                 | 56                        | 71937         | 72145           | ADNIMERGE |
| ST56SA             | 246                 | 59                        | 69892         | 70197           | ADNIMERGE |
| VSWEIGHT           | 34                  | 55                        | 68231         | 68320           | ADNIMERGE |
| ST110SA            | 220                 | 72                        | 66809         | 67101           | ADNIMERGE |
| ST58SA             | 197                 | 55                        | 63784         | 64036           | ADNIMERGE |
| ST51SA             | 216                 | 68                        | 61998         | 62282           | ADNIMERGE |
| ST117SA            | 219                 | 53                        | 61404         | 61676           | ADNIMERGE |
| WHOLEBRAIN.BL      | 279                 | 60                        | 60265         | 60604           | ADNIMERGE |
| IMAGEUID           | 155                 | 4                         | 60270         | 60429           | ADNIMERGE |
| IMAGEUID.BL        | 155                 | 4                         | 60270         | 60429           | ADNIMERGE |
| WHOLEBRAIN         | 279                 | 60                        | 60015         | 60354           | ADNIMERGE |
| ST49SA             | 226                 | 57                        | 58630         | 58913           | ADNIMERGE |

|                                    |     |    |       |       |           |
|------------------------------------|-----|----|-------|-------|-----------|
| IMAGEUID_2                         | 161 | 9  | 58717 | 58887 | ADNIMERGE |
| IMAGEUID_1                         | 158 | 5  | 57163 | 57326 | ADNIMERGE |
| LONISID                            | 156 | 7  | 55744 | 55907 | ADNIMERGE |
| ST80SV                             | 125 | 77 | 55705 | 55907 | ADNIMERGE |
| PTNO                               | 157 | 7  | 55716 | 55880 | ADNIMERGE |
| ST40SA                             | 197 | 51 | 55574 | 55822 | ADNIMERGE |
| EXAMDATE.BL                        | 152 | 7  | 54576 | 54735 | ADNIMERGE |
| ST111SA                            | 230 | 58 | 54263 | 54551 | ADNIMERGE |
| ST108SA                            | 226 | 56 | 53499 | 53781 | ADNIMERGE |
| ST124SV                            | 203 | 42 | 53000 | 53245 | ADNIMERGE |
| ST115SA                            | 233 | 57 | 52643 | 52933 | ADNIMERGE |
| TAURINE                            | 129 | 0  | 52713 | 52842 | ADNIMERGE |
| ST52SA                             | 206 | 52 | 51936 | 52194 | ADNIMERGE |
| SAMPLE_BAR_CODE                    | 165 | 8  | 51969 | 52142 | ADNIMERGE |
| VAL                                | 77  | 1  | 51265 | 51343 | ADNIMERGE |
| LEFT_CEREBRAL_WHITE_MATTER_VOLUME  | 257 | 50 | 50790 | 51097 | ADNIMERGE |
| ST99SA                             | 240 | 52 | 50566 | 50858 | ADNIMERGE |
| SAMPLE.BAR.CODE                    | 163 | 7  | 50321 | 50491 | ADNIMERGE |
| RIGHT_CEREBRAL_WHITE_MATTER_VOLUME | 255 | 50 | 49763 | 50068 | ADNIMERGE |
| ST90SA                             | 228 | 60 | 49349 | 49637 | ADNIMERGE |
| URNVOL                             | 151 | 0  | 49357 | 49508 | ADNIMERGE |
| URN                                | 149 | 0  | 49301 | 49450 | ADNIMERGE |
| SAMPLE.IDENTIFICATION              | 156 | 6  | 48127 | 48289 | ADNIMERGE |
| ST82SA                             | 120 | 56 | 47444 | 47620 | ADNIMERGE |
| VENTRICLE_3RD_VOLUME               | 134 | 74 | 46036 | 46244 | ADNIMERGE |
| RIGHT_CHOROID_PLEXUS_VOLUME        | 139 | 71 | 45453 | 45663 | ADNIMERGE |
| ST105SA                            | 132 | 53 | 43618 | 43803 | ADNIMERGE |
| ST120SV                            | 250 | 43 | 41733 | 42026 | ADNIMERGE |
| ST114SA                            | 238 | 58 | 40147 | 40443 | ADNIMERGE |
| ST109SA                            | 180 | 25 | 38576 | 38781 | ADNIMERGE |
| ST36SA                             | 236 | 52 | 38176 | 38464 | ADNIMERGE |
| ST1SV                              | 242 | 52 | 37628 | 37922 | ADNIMERGE |
| ST127SV                            | 134 | 84 | 37493 | 37711 | ADNIMERGE |
| LEU                                | 81  | 51 | 36427 | 36559 | ADNIMERGE |
| ST61SV                             | 239 | 44 | 35916 | 36199 | ADNIMERGE |
| BRAIN_STEM_VOLUME                  | 241 | 51 | 35612 | 35904 | ADNIMERGE |

|                                   |     |    |       |       |           |
|-----------------------------------|-----|----|-------|-------|-----------|
| ST91SA                            | 232 | 51 | 35267 | 35550 | ADNIMERGE |
| ST55SA                            | 242 | 53 | 34948 | 35243 | ADNIMERGE |
| ST59SA                            | 211 | 47 | 34914 | 35172 | ADNIMERGE |
| XL.HDL.PL                         | 124 | 94 | 34618 | 34836 | ADNIMERGE |
| ST46SA                            | 162 | 42 | 33933 | 34137 | ADNIMERGE |
| HDL.C                             | 129 | 97 | 32870 | 33096 | ADNIMERGE |
| ST102SA                           | 143 | 42 | 32735 | 32920 | ADNIMERGE |
| HDL2.C                            | 123 | 96 | 32408 | 32627 | ADNIMERGE |
| C14.1                             | 110 | 0  | 32069 | 32179 | ADNIMERGE |
| LEFT_VENTRALDC_VOLUME             | 249 | 47 | 31558 | 31854 | ADNIMERGE |
| L.HDL.P                           | 111 | 98 | 31198 | 31407 | ADNIMERGE |
| ST116SA                           | 208 | 50 | 31042 | 31300 | ADNIMERGE |
| L.HDL.L                           | 109 | 98 | 30953 | 31160 | ADNIMERGE |
| XL.HDL.L                          | 130 | 83 | 30929 | 31142 | ADNIMERGE |
| CTX_LH_ISTHMUSCINGULATE_VOLUME    | 248 | 47 | 30823 | 31118 | ADNIMERGE |
| L.HDL.FC                          | 104 | 96 | 30759 | 30959 | ADNIMERGE |
| ST32SA                            | 232 | 51 | 30377 | 30660 | ADNIMERGE |
| L.HDL.C                           | 103 | 96 | 30276 | 30475 | ADNIMERGE |
| L.HDL.PL                          | 118 | 98 | 30089 | 30305 | ADNIMERGE |
| ST95SA                            | 217 | 49 | 29938 | 30204 | ADNIMERGE |
| L.HDL.CE                          | 103 | 94 | 29703 | 29900 | ADNIMERGE |
| XL.HDL.P                          | 131 | 77 | 29483 | 29691 | ADNIMERGE |
| XL.HDL.FC                         | 132 | 82 | 29277 | 29491 | ADNIMERGE |
| LYSOPC.A.C18.1                    | 147 | 0  | 29314 | 29461 | ADNIMERGE |
| ST50SA                            | 208 | 28 | 29216 | 29452 | ADNIMERGE |
| CREA                              | 7   | 99 | 27516 | 27622 | ADNIMERGE |
| ST21SV                            | 98  | 61 | 26656 | 26815 | ADNIMERGE |
| ST98SA                            | 240 | 47 | 25763 | 26050 | ADNIMERGE |
| PHE                               | 105 | 0  | 25889 | 25994 | ADNIMERGE |
| PE.P.16.0.22.4                    | 127 | 0  | 25721 | 25848 | ADNIMERGE |
| TOTCHO                            | 135 | 60 | 25489 | 25684 | ADNIMERGE |
| HDL.D                             | 115 | 86 | 25331 | 25532 | ADNIMERGE |
| ST107SA                           | 103 | 25 | 24770 | 24898 | ADNIMERGE |
| ST43SA                            | 163 | 43 | 24610 | 24816 | ADNIMERGE |
| GLU                               | 98  | 0  | 23624 | 23722 | ADNIMERGE |
| ST31SA                            | 201 | 49 | 23251 | 23501 | ADNIMERGE |
| CTX_LH_MEDIALORBITOFRONTAL_VOLUME | 257 | 48 | 22565 | 22870 | ADNIMERGE |
| PE.18.0.22.4                      | 102 | 0  | 21797 | 21899 | ADNIMERGE |
| ST39CV                            | 340 | 9  | 21119 | 21468 | ADNIMERGE |

|                               |     |     |       |       |           |
|-------------------------------|-----|-----|-------|-------|-----------|
| L.HDL.TG                      | 117 | 49  | 21118 | 21284 | ADNIMERGE |
| PC                            | 138 | 58  | 20559 | 20755 | ADNIMERGE |
| LEFT_CHOROID_PLEXUS_VOLUME    | 75  | 65  | 19482 | 19622 | ADNIMERGE |
| ST76SV                        | 203 | 54  | 19351 | 19608 | ADNIMERGE |
| LEFT_INF_LAT_VENT_VOLUME      | 215 | 102 | 19073 | 19390 | ADNIMERGE |
| ST57SA                        | 185 | 44  | 19074 | 19303 | ADNIMERGE |
| CTX_LH_INSULA_VOLUME          | 248 | 43  | 18819 | 19110 | ADNIMERGE |
| CTX_RH_INSULA_VOLUME          | 262 | 47  | 18752 | 19061 | ADNIMERGE |
| TOTPG                         | 138 | 60  | 18432 | 18630 | ADNIMERGE |
| PRO                           | 22  | 8   | 18379 | 18409 | ADNIMERGE |
| ST82CV                        | 173 | 38  | 18119 | 18330 | ADNIMERGE |
| XL.HDL.C                      | 129 | 63  | 17678 | 17870 | ADNIMERGE |
| ST118SA                       | 216 | 43  | 17604 | 17863 | ADNIMERGE |
| ST97SA                        | 168 | 29  | 17274 | 17471 | ADNIMERGE |
| ST30SV                        | 184 | 102 | 16774 | 17060 | ADNIMERGE |
| RIGHT_INF_LAT_VENT_VOLUME     | 225 | 75  | 16581 | 16881 | ADNIMERGE |
| PC.AE.C40.5                   | 174 | 0   | 16578 | 16752 | ADNIMERGE |
| ST47SA                        | 59  | 0   | 16292 | 16351 | ADNIMERGE |
| ST36CV                        | 263 | 42  | 16015 | 16320 | ADNIMERGE |
| ST69SV                        | 24  | 40  | 15441 | 15505 | ADNIMERGE |
| ST15SA                        | 175 | 45  | 15227 | 15447 | ADNIMERGE |
| LEFT_LATERAL_VENTRICLE_VOLUME | 145 | 109 | 15071 | 15325 | ADNIMERGE |
| ARG                           | 104 | 0   | 15210 | 15314 | ADNIMERGE |
| LYS                           | 105 | 0   | 15007 | 15112 | ADNIMERGE |
| ST91CV                        | 260 | 40  | 13931 | 14231 | ADNIMERGE |
| PE.P.16.0.18.2                | 129 | 0   | 13687 | 13816 | ADNIMERGE |
| ST26SA                        | 244 | 44  | 13311 | 13599 | ADNIMERGE |
| ST39SA                        | 301 | 38  | 13168 | 13507 | ADNIMERGE |
| RIGHT_THALAMUS_PROPER_VOLUME  | 256 | 0   | 13224 | 13480 | ADNIMERGE |
| ST99TS                        | 50  | 0   | 13381 | 13431 | ADNIMERGE |
| ST32CV                        | 250 | 43  | 12595 | 12888 | ADNIMERGE |
| ST94CV                        | 233 | 46  | 12384 | 12663 | ADNIMERGE |
| ST89SV                        | 187 | 124 | 12099 | 12410 | ADNIMERGE |
| ST130CV                       | 343 | 3   | 11914 | 12260 | ADNIMERGE |
| ST130SA                       | 304 | 34  | 11695 | 12033 | ADNIMERGE |
| ST114CV                       | 254 | 48  | 11678 | 11980 | ADNIMERGE |
| ST56CV                        | 288 | 38  | 11654 | 11980 | ADNIMERGE |



|                                |     |     |       |       |           |
|--------------------------------|-----|-----|-------|-------|-----------|
| ST109TA                        | 137 | 0   | 11795 | 11932 | ADNIMERGE |
| VENTVOL                        | 144 | 114 | 11651 | 11909 | ADNIMERGE |
| GCDCA                          | 92  | 0   | 11703 | 11795 | ADNIMERGE |
| CTX_RH_PRECUNEUS_VOLUME        | 320 | 32  | 11207 | 11559 | ADNIMERGE |
| ST111CV                        | 324 | 21  | 10783 | 11128 | ADNIMERGE |
| ST37SV                         | 138 | 117 | 10730 | 10985 | ADNIMERGE |
| ST94TA                         | 259 | 0   | 10643 | 10902 | ADNIMERGE |
| PC.AE.C36.3                    | 156 | 0   | 10443 | 10599 | ADNIMERGE |
| PC.AA.C36.1                    | 207 | 0   | 10372 | 10579 | ADNIMERGE |
| VENTRICLES.BL                  | 144 | 107 | 9940  | 10191 | ADNIMERGE |
| VENTRICLES                     | 144 | 107 | 9938  | 10189 | ADNIMERGE |
| ST35TA                         | 233 | 1   | 9502  | 9736  | ADNIMERGE |
| ST34SA                         | 269 | 25  | 9141  | 9435  | ADNIMERGE |
| PC.AE.C38.5                    | 154 | 0   | 9138  | 9292  | ADNIMERGE |
| ST93SA                         | 266 | 2   | 8977  | 9245  | ADNIMERGE |
| PC.AE.C38.4                    | 125 | 0   | 8994  | 9119  | ADNIMERGE |
| ST34CV                         | 320 | 1   | 8584  | 8905  | ADNIMERGE |
| ST95CV                         | 247 | 32  | 8424  | 8703  | ADNIMERGE |
| ST85CV                         | 346 | 5   | 8225  | 8576  | ADNIMERGE |
| CSF_VOLUME                     | 94  | 54  | 8200  | 8348  | ADNIMERGE |
| SM.C24.1                       | 170 | 2   | 8151  | 8323  | ADNIMERGE |
| XL.HDL.CE                      | 129 | 60  | 7923  | 8112  | ADNIMERGE |
| ST129SA                        | 258 | 46  | 7756  | 8060  | ADNIMERGE |
| NON_WM_HYPOINTENSITIES_VOLUME  | 130 | 27  | 7853  | 8010  | ADNIMERGE |
| ST48SA                         | 116 | 2   | 7826  | 7944  | ADNIMERGE |
| FUSIFORM.BL                    | 317 | 40  | 7390  | 7747  | ADNIMERGE |
| PC.AE.C38.3                    | 170 | 0   | 7423  | 7593  | ADNIMERGE |
| SM.OH.C22.2                    | 176 | 62  | 7318  | 7556  | ADNIMERGE |
| CTX_LH_PRECUNEUS_VOLUME        | 304 | 20  | 7206  | 7530  | ADNIMERGE |
| LYSOPC.A.C20.4                 | 90  | 0   | 7326  | 7416  | ADNIMERGE |
| DX.BL                          | 251 | 0   | 7069  | 7320  | ADNIMERGE |
| FUSIFORM                       | 313 | 35  | 6965  | 7313  | ADNIMERGE |
| SM.C16.0                       | 171 | 11  | 6938  | 7120  | ADNIMERGE |
| RIGHT_LATERAL_VENTRICLE_VOLUME | 128 | 50  | 6817  | 6995  | ADNIMERGE |
| ST17SV                         | 194 | 47  | 6611  | 6852  | ADNIMERGE |
| ST90TS                         | 34  | 0   | 6740  | 6774  | ADNIMERGE |
| ST72SA                         | 172 | 34  | 6355  | 6561  | ADNIMERGE |
| ST62SA                         | 102 | 5   | 6314  | 6421  | ADNIMERGE |

|                                        |     |     |      |      |           |
|----------------------------------------|-----|-----|------|------|-----------|
| SM.C16.1                               | 232 | 62  | 5922 | 6216 | ADNIMERGE |
| ST115CV                                | 291 | 28  | 5827 | 6146 | ADNIMERGE |
| ST93CV                                 | 303 | 0   | 5831 | 6134 | ADNIMERGE |
| ST96SV                                 | 128 | 71  | 5885 | 6084 | ADNIMERGE |
| ST85SA                                 | 277 | 47  | 5753 | 6077 | ADNIMERGE |
| ST111TA                                | 243 | 0   | 5518 | 5761 | ADNIMERGE |
| PTDOB                                  | 213 | 616 | 4930 | 5759 | ADNIMERGE |
| ST103CV                                | 289 | 0   | 5044 | 5333 | ADNIMERGE |
| ST35CV                                 | 238 | 45  | 5047 | 5330 | ADNIMERGE |
| PC.AE.C36.4                            | 146 | 0   | 5120 | 5266 | ADNIMERGE |
| LYSOPC.A.C18.2                         | 84  | 0   | 5111 | 5195 | ADNIMERGE |
| ST54SA                                 | 249 | 19  | 4832 | 5100 | ADNIMERGE |
| CTX_RH_LATERALOCIPITAL_VOLUME          | 313 | 25  | 4754 | 5092 | ADNIMERGE |
| ST51TA                                 | 246 | 0   | 4770 | 5016 | ADNIMERGE |
| ST55CV                                 | 278 | 36  | 4667 | 4981 | ADNIMERGE |
| CTX_RH_SUPERIORFRONTAL_VOLUME          | 312 | 5   | 4603 | 4920 | ADNIMERGE |
| ST103SA                                | 269 | 3   | 4629 | 4901 | ADNIMERGE |
| MIDTEMP                                | 290 | 37  | 4573 | 4900 | ADNIMERGE |
| MIDTEMP.BL                             | 290 | 37  | 4572 | 4899 | ADNIMERGE |
| PC.AE.C36.2                            | 149 | 0   | 4733 | 4882 | ADNIMERGE |
| WM_HYPOINTENSITIES_VOLUME              | 149 | 28  | 4680 | 4857 | ADNIMERGE |
| ST34TS                                 | 116 | 0   | 4728 | 4844 | ADNIMERGE |
| CTX_LH_SUPERIORFRONTAL_VOLUME          | 312 | 10  | 4451 | 4773 | ADNIMERGE |
| MELGDATE                               | 72  | 0   | 4673 | 4745 | ADNIMERGE |
| LEFT_CEREBELLUM_WHITE_MATTER_VOLUME    | 216 | 0   | 4469 | 4685 | ADNIMERGE |
| ST23SA                                 | 125 | 41  | 4507 | 4673 | ADNIMERGE |
| CTX_LH_ROSTRALANTERIORCINGULATE_VOLUME | 212 | 40  | 4358 | 4610 | ADNIMERGE |
| ST15TS                                 | 31  | 0   | 4563 | 4594 | ADNIMERGE |
| ST110TS                                | 34  | 0   | 4356 | 4390 | ADNIMERGE |
| CTX_RH_ROSTRALMIDDLEFRONTAL_VOLUME     | 269 | 43  | 4073 | 4385 | ADNIMERGE |
| ST52CV                                 | 294 | 11  | 4039 | 4344 | ADNIMERGE |
| ALA                                    | 110 | 0   | 4193 | 4303 | ADNIMERGE |
| CTX_RH_INFERIORPARIETAL_VOLUME         | 293 | 27  | 3962 | 4282 | ADNIMERGE |

|                                    |     |    |      |      |           |
|------------------------------------|-----|----|------|------|-----------|
| RIGHT_VENTRALDC_VOLUME             | 263 | 40 | 3957 | 4260 | ADNIMERGE |
| ST51TS                             | 32  | 0  | 4150 | 4182 | ADNIMERGE |
| ST26CV                             | 314 | 4  | 3782 | 4100 | ADNIMERGE |
| ST55TS                             | 43  | 0  | 4032 | 4075 | ADNIMERGE |
| CTX_LH_ROSTRALMIDDLEFRONTAL_VOLUME | 292 | 18 | 3687 | 3997 | ADNIMERGE |
| RIGHT_CEREBELLUM_CORTEX_VOLUME     | 220 | 50 | 3599 | 3869 | ADNIMERGE |
| VSHEIGHT                           | 48  | 62 | 3701 | 3811 | ADNIMERGE |
| SM.C24.0                           | 148 | 0  | 3541 | 3689 | ADNIMERGE |
| ST54CV                             | 256 | 0  | 3425 | 3681 | ADNIMERGE |
| LONI_STUDY                         | 74  | 7  | 3542 | 3623 | ADNIMERGE |
| SM.OH.C22.1                        | 160 | 46 | 3356 | 3562 | ADNIMERGE |
| ST40CV                             | 266 | 34 | 3195 | 3495 | ADNIMERGE |
| CTX_RH_POSTCENTRAL_VOLUME          | 288 | 0  | 3184 | 3472 | ADNIMERGE |
| ST108TA                            | 198 | 0  | 3245 | 3443 | ADNIMERGE |
| ST59TA                             | 248 | 0  | 3170 | 3418 | ADNIMERGE |
| CTX_RH_FUSIFORM_VOLUME             | 302 | 6  | 3110 | 3418 | ADNIMERGE |
| ST101SV                            | 157 | 23 | 3226 | 3406 | ADNIMERGE |
| CTX_RH_MIDDLETEMPORAL_VOLUME       | 299 | 9  | 3077 | 3385 | ADNIMERGE |
| CTX_LH_MIDDLETEMPORAL_VOLUME       | 294 | 2  | 3015 | 3311 | ADNIMERGE |
| LONI_IMAGE                         | 74  | 6  | 3218 | 3298 | ADNIMERGE |
| CTX_LH_LATERALOCIPITAL_VOLUME      | 302 | 3  | 2970 | 3275 | ADNIMERGE |
| ST99CV                             | 279 | 33 | 2959 | 3271 | ADNIMERGE |
| ST58CV                             | 285 | 8  | 2850 | 3143 | ADNIMERGE |
| CTX_LH_PRECENTRAL_VOLUME           | 332 | 0  | 2761 | 3093 | ADNIMERGE |
| PC.AE.C34.1                        | 169 | 0  | 2884 | 3053 | ADNIMERGE |
| ST49TA                             | 191 | 0  | 2842 | 3033 | ADNIMERGE |
| CTX_LH_LATERALORBITOFRONTAL_VOLUME | 278 | 28 | 2723 | 3029 | ADNIMERGE |
| CTX_RH_PRECENTRAL_VOLUME           | 323 | 2  | 2688 | 3013 | ADNIMERGE |
| CEREBELLUMGREYMATTER_VOLUME        | 230 | 50 | 2663 | 2943 | ADNIMERGE |
| CTX_RH_CUNEUS_VOLUME               | 238 | 8  | 2693 | 2939 | ADNIMERGE |
| ST90CV                             | 296 | 30 | 2598 | 2924 | ADNIMERGE |

|                                      |     |    |      |      |           |
|--------------------------------------|-----|----|------|------|-----------|
| LEFT_THALAMUS_PROPER_VOLUME          | 259 | 0  | 2487 | 2746 | ADNIMERGE |
| CTX_RH_INFERIORETEMPORAL_VOLUME      | 276 | 30 | 2439 | 2745 | ADNIMERGE |
| CTX_RH_SUPERIORETEMPORAL_VOLUME      | 311 | 0  | 2419 | 2730 | ADNIMERGE |
| CTX_RH_ISTHUSCINGULATE_VOLUME        | 210 | 5  | 2511 | 2726 | ADNIMERGE |
| LEFT_AMYGDALA_VOLUME                 | 342 | 0  | 2363 | 2705 | ADNIMERGE |
| PC.AE.C34.2                          | 145 | 2  | 2556 | 2703 | ADNIMERGE |
| CTX_LH_POSTCENTRAL_VOLUME            | 303 | 0  | 2359 | 2662 | ADNIMERGE |
| ST98CV                               | 271 | 5  | 2381 | 2657 | ADNIMERGE |
| TRP                                  | 50  | 0  | 2535 | 2585 | ADNIMERGE |
| WHOLECEREBELLUM_VOLUME               | 258 | 45 | 2267 | 2570 | ADNIMERGE |
| ST38SA                               | 167 | 0  | 2391 | 2558 | ADNIMERGE |
| ST44SA                               | 238 | 0  | 2257 | 2495 | ADNIMERGE |
| HDL3.C                               | 135 | 54 | 2287 | 2476 | ADNIMERGE |
| PC.AE.C38.6                          | 155 | 0  | 2278 | 2433 | ADNIMERGE |
| ST42SV                               | 191 | 43 | 2144 | 2378 | ADNIMERGE |
| ST85TA                               | 279 | 0  | 2064 | 2343 | ADNIMERGE |
| ST50TA                               | 158 | 0  | 2167 | 2325 | ADNIMERGE |
| CTX_LH_FUSIFORM_VOLUME               | 285 | 4  | 2002 | 2291 | ADNIMERGE |
| CTX_RH_LATERALORBITOFRONTAL_VOLUME   | 261 | 27 | 1931 | 2219 | ADNIMERGE |
| RIGHT_CEREBELLUM_WHITE_MATTER_VOLUME | 209 | 0  | 1945 | 2154 | ADNIMERGE |
| ST13TA                               | 195 | 0  | 1910 | 2105 | ADNIMERGE |
| ST49CV                               | 286 | 0  | 1793 | 2079 | ADNIMERGE |
| CTX_RH_LINGUAL_VOLUME                | 246 | 0  | 1813 | 2059 | ADNIMERGE |
| CTX_LH_SUPERIORETEMPORAL_VOLUME      | 313 | 0  | 1739 | 2052 | ADNIMERGE |
| ST59CV                               | 292 | 2  | 1731 | 2025 | ADNIMERGE |
| ST91TS                               | 41  | 0  | 1937 | 1978 | ADNIMERGE |
| ST129CV                              | 308 | 0  | 1617 | 1925 | ADNIMERGE |
| ST108CV                              | 272 | 0  | 1619 | 1891 | ADNIMERGE |
| PC.AE.C34.3                          | 130 | 5  | 1739 | 1874 | ADNIMERGE |
| CTX_LH_POSTERIORCINGULATE_VOLUME     | 234 | 0  | 1619 | 1853 | ADNIMERGE |
| PC.AA.C38.3                          | 196 | 34 | 1622 | 1852 | ADNIMERGE |

|                                   |     |    |      |      |           |
|-----------------------------------|-----|----|------|------|-----------|
| VENTRICLE_3RD_SUVR                | 152 | 2  | 1695 | 1849 | ADNIMERGE |
| RIGHT_PALLIDUM_VOLUME             | 213 | 43 | 1559 | 1815 | ADNIMERGE |
| ST97CV                            | 230 | 0  | 1553 | 1783 | ADNIMERGE |
| ST97TA                            | 198 | 0  | 1584 | 1782 | ADNIMERGE |
| CTX_LH_BANKSSTS_VOLUME            | 246 | 0  | 1527 | 1773 | ADNIMERGE |
| CTX_RH_SUPERIORPARIETAL_VOLUME    | 303 | 0  | 1460 | 1763 | ADNIMERGE |
| ST110TA                           | 220 | 2  | 1533 | 1755 | ADNIMERGE |
| M.HDL.FC                          | 70  | 49 | 1595 | 1714 | ADNIMERGE |
| LEFT_CEREBELLUM_CORTEX_VOLUME     | 218 | 45 | 1369 | 1632 | ADNIMERGE |
| ST58TA                            | 293 | 1  | 1337 | 1631 | ADNIMERGE |
| CTX_LH_SUPRAMARGINAL_VOLUME       | 291 | 1  | 1249 | 1541 | ADNIMERGE |
| CTX_LH_LINGUAL_VOLUME             | 254 | 0  | 1285 | 1539 | ADNIMERGE |
| ST117CV                           | 287 | 2  | 1223 | 1512 | ADNIMERGE |
| ST45TS                            | 27  | 0  | 1468 | 1495 | ADNIMERGE |
| ST102TA                           | 161 | 0  | 1328 | 1489 | ADNIMERGE |
| ST32TS                            | 36  | 0  | 1372 | 1408 | ADNIMERGE |
| ST56TS                            | 52  | 0  | 1331 | 1383 | ADNIMERGE |
| SM.C18.1                          | 180 | 55 | 1125 | 1360 | ADNIMERGE |
| ST90TA                            | 240 | 0  | 1107 | 1347 | ADNIMERGE |
| CTX_RH_SUPRAMARGINAL_VOLUME       | 280 | 0  | 1052 | 1332 | ADNIMERGE |
| ST50CV                            | 225 | 0  | 1098 | 1323 | ADNIMERGE |
| PC.AE.C40.6                       | 143 | 0  | 1172 | 1315 | ADNIMERGE |
| ST113SA                           | 216 | 0  | 1095 | 1311 | ADNIMERGE |
| ST7SV                             | 77  | 44 | 1187 | 1308 | ADNIMERGE |
| CTX_LH_CAUDALMIDDLEFRONTAL_VOLUME | 263 | 0  | 1011 | 1274 | ADNIMERGE |
| M.HDL.C                           | 66  | 40 | 1155 | 1261 | ADNIMERGE |
| CTX_LH_INFERIORTEMPORAL_VOLUME    | 257 | 43 | 957  | 1257 | ADNIMERGE |
| CTX_LH_INFERIORPARIETAL_VOLUME    | 269 | 1  | 978  | 1248 | ADNIMERGE |
| ST40TS                            | 39  | 0  | 1189 | 1228 | ADNIMERGE |
| MET                               | 48  | 0  | 1176 | 1224 | ADNIMERGE |
| SER                               | 80  | 0  | 1133 | 1213 | ADNIMERGE |
| M.HDL.PL                          | 73  | 49 | 1090 | 1212 | ADNIMERGE |

|                                   |     |    |      |      |           |
|-----------------------------------|-----|----|------|------|-----------|
| CTX_RH_MEDIALORBITOFRONTAL_VOLUME | 237 | 12 | 956  | 1205 | ADNIMERGE |
| M.HDL.L                           | 65  | 45 | 1083 | 1193 | ADNIMERGE |
| ST18SV                            | 135 | 0  | 1045 | 1180 | ADNIMERGE |
| ST128SV                           | 118 | 6  | 1047 | 1171 | ADNIMERGE |
| ST14SA                            | 174 | 2  | 995  | 1171 | ADNIMERGE |
| ST51CV                            | 310 | 0  | 838  | 1148 | ADNIMERGE |
| OPTIC_CHIASM_VOLUME               | 25  | 0  | 1121 | 1146 | ADNIMERGE |
| M.HDL.CE                          | 66  | 36 | 988  | 1090 | ADNIMERGE |
| CTX_LH_SUPERIORPARIETAL_VOLUME    | 295 | 0  | 794  | 1089 | ADNIMERGE |
| ST26TA                            | 276 | 0  | 808  | 1084 | ADNIMERGE |
| M.HDL.P                           | 66  | 45 | 956  | 1067 | ADNIMERGE |
| ST13SA                            | 141 | 10 | 911  | 1062 | ADNIMERGE |
| ST74TS                            | 31  | 0  | 1010 | 1041 | ADNIMERGE |
| ST110CV                           | 288 | 1  | 728  | 1017 | ADNIMERGE |
| ST116CV                           | 302 | 0  | 703  | 1005 | ADNIMERGE |
| ST52TA                            | 232 | 0  | 745  | 977  | ADNIMERGE |
| CTX_RH_BANKSSTS_VOLUME            | 227 | 0  | 738  | 965  | ADNIMERGE |
| CSF_SUVR                          | 141 | 5  | 764  | 910  | ADNIMERGE |
| ST74SA                            | 144 | 5  | 741  | 890  | ADNIMERGE |
| ST38CV                            | 224 | 0  | 621  | 845  | ADNIMERGE |
| CTX_RH_PARSOPERCULARIS_VOLUME     | 223 | 0  | 580  | 803  | ADNIMERGE |
| ST104TS                           | 29  | 0  | 747  | 776  | ADNIMERGE |
| LEFT_PUTAMEN_VOLUME               | 206 | 3  | 563  | 772  | ADNIMERGE |
| ST119SA                           | 38  | 2  | 722  | 762  | ADNIMERGE |
| ORN                               | 62  | 0  | 694  | 756  | ADNIMERGE |
| ST113CV                           | 211 | 0  | 536  | 747  | ADNIMERGE |
| ST118CV                           | 295 | 0  | 447  | 742  | ADNIMERGE |
| RIGHT_ACCUMBENS_AREA_VOLUME       | 281 | 0  | 448  | 729  | ADNIMERGE |
| PE.16.0.18.3                      | 156 | 0  | 540  | 696  | ADNIMERGE |
| ST104SA                           | 141 | 0  | 545  | 686  | ADNIMERGE |
| ST77SV                            | 134 | 0  | 538  | 672  | ADNIMERGE |
| PC.AA.C34.3                       | 181 | 47 | 421  | 649  | ADNIMERGE |
| ST31CV                            | 271 | 0  | 363  | 634  | ADNIMERGE |
| CTX_RH_PARACENTRAL_VOLUME         | 244 | 0  | 379  | 623  | ADNIMERGE |
| RIGHT_AMYGDALA_VOLUME             | 324 | 31 | 255  | 610  | ADNIMERGE |

|                                   |     |    |     |     |           |
|-----------------------------------|-----|----|-----|-----|-----------|
| CTX_LH_CUNEUS_VOLUME              | 214 | 0  | 392 | 606 | ADNIMERGE |
| ST57TA                            | 171 | 0  | 431 | 602 | ADNIMERGE |
| ST103TA                           | 167 | 0  | 434 | 601 | ADNIMERGE |
| ST57CV                            | 286 | 0  | 305 | 591 | ADNIMERGE |
| CTX_RH_CAUDALMIDDLEFRONTAL_VOLUME | 229 | 0  | 337 | 566 | ADNIMERGE |
| ST82TA                            | 109 | 0  | 438 | 547 | ADNIMERGE |
| CTX_RH_PARAHIPPOCAMPAL_VOLUME     | 254 | 0  | 279 | 533 | ADNIMERGE |
| ST44CV                            | 257 | 0  | 275 | 532 | ADNIMERGE |
| CC_MID_ANTERIOR_VOLUME            | 239 | 1  | 280 | 520 | ADNIMERGE |
| PC.AA.C40.4                       | 153 | 0  | 365 | 518 | ADNIMERGE |
| ST53SV                            | 221 | 13 | 282 | 516 | ADNIMERGE |
| SM.C18.0                          | 165 | 46 | 304 | 515 | ADNIMERGE |
| ST109CV                           | 205 | 0  | 307 | 512 | ADNIMERGE |
| ST45CV                            | 267 | 0  | 243 | 510 | ADNIMERGE |
| ST107CV                           | 148 | 0  | 359 | 507 | ADNIMERGE |
| PC.AE.C40.2                       | 154 | 0  | 350 | 504 | ADNIMERGE |
| CC_CENTRAL_VOLUME                 | 224 | 1  | 279 | 504 | ADNIMERGE |
| CTX_RH_POSTERIORCINGULATE_VOLUME  | 230 | 0  | 261 | 491 | ADNIMERGE |
| ST118TA                           | 207 | 0  | 277 | 484 | ADNIMERGE |
| ST47TS                            | 29  | 0  | 454 | 483 | ADNIMERGE |
| ST112SV                           | 195 | 24 | 262 | 481 | ADNIMERGE |
| LEFT_PALLIDUM_VOLUME              | 78  | 34 | 366 | 478 | ADNIMERGE |
| SM                                | 132 | 44 | 292 | 468 | ADNIMERGE |
| ST117TA                           | 278 | 0  | 180 | 458 | ADNIMERGE |
| FREEC                             | 131 | 30 | 285 | 446 | ADNIMERGE |
| ST113TS                           | 34  | 0  | 408 | 442 | ADNIMERGE |
| ST73SA                            | 173 | 0  | 256 | 429 | ADNIMERGE |
| ST45SA                            | 191 | 0  | 236 | 427 | ADNIMERGE |
| ST119TS                           | 22  | 0  | 405 | 427 | ADNIMERGE |
| ST72CV                            | 224 | 0  | 195 | 419 | ADNIMERGE |
| RIGHT_HIPPOCAMPUS_VOLUME          | 338 | 0  | 79  | 417 | ADNIMERGE |
| CTX_LH_PARSOPERCULARIS_VOLUME     | 224 | 0  | 188 | 412 | ADNIMERGE |
| ST31TA                            | 218 | 0  | 190 | 408 | ADNIMERGE |
| ST106SA                           | 75  | 10 | 319 | 404 | ADNIMERGE |
| ST38TA                            | 214 | 0  | 182 | 396 | ADNIMERGE |

|                           |     |     |     |     |           |
|---------------------------|-----|-----|-----|-----|-----------|
| PC.AA.C38.5               | 183 | 9   | 196 | 388 | ADNIMERGE |
| AGE                       | 124 | 210 | 46  | 380 | ADNIMERGE |
| SROI                      | 294 | 0   | 86  | 380 | ADNIMERGE |
| ST91TA                    | 249 | 0   | 127 | 376 | ADNIMERGE |
| CC_MID_POSTERIOR_VOLUME   | 181 | 0   | 193 | 374 | ADNIMERGE |
| ST99TA                    | 250 | 0   | 119 | 369 | ADNIMERGE |
| ST31TS                    | 33  | 0   | 331 | 364 | ADNIMERGE |
| ST40TA                    | 275 | 0   | 88  | 363 | ADNIMERGE |
| ST12SV                    | 313 | 0   | 47  | 360 | ADNIMERGE |
| PQDATE                    | 52  | 8   | 298 | 358 | ADNIMERGE |
| ST39TS                    | 22  | 0   | 336 | 358 | ADNIMERGE |
| ST118TS                   | 39  | 0   | 312 | 351 | ADNIMERGE |
| ESTC                      | 132 | 29  | 189 | 350 | ADNIMERGE |
| PC.AA.C34.2               | 48  | 0   | 300 | 348 | ADNIMERGE |
| PC.AA.C40.5               | 191 | 8   | 145 | 344 | ADNIMERGE |
| CC_ANTERIOR_VOLUME        | 218 | 0   | 125 | 343 | ADNIMERGE |
| LEFT_HIPPOCAMPUS_VOLUME   | 300 | 0   | 42  | 342 | ADNIMERGE |
| ST93TS                    | 72  | 0   | 260 | 332 | ADNIMERGE |
| ESTIMATE                  | 317 | 0   | 15  | 332 | ADNIMERGE |
| UPR                       | 317 | 0   | 15  | 332 | ADNIMERGE |
| ST88SV                    | 322 | 0   | 7   | 329 | ADNIMERGE |
| LWR                       | 316 | 0   | 13  | 329 | ADNIMERGE |
| SM.OH.C16.1               | 140 | 3   | 184 | 327 | ADNIMERGE |
| SERUM.C                   | 131 | 30  | 165 | 326 | ADNIMERGE |
| ST83SA                    | 35  | 13  | 277 | 325 | ADNIMERGE |
| HIPPOCAMPUS               | 312 | 0   | 5   | 317 | ADNIMERGE |
| HIPPOCAMPUS.BL            | 307 | 0   | 5   | 312 | ADNIMERGE |
| ST23CV                    | 177 | 4   | 128 | 309 | ADNIMERGE |
| ST98TS                    | 31  | 0   | 269 | 300 | ADNIMERGE |
| ST29SV                    | 296 | 0   | 3   | 299 | ADNIMERGE |
| ST102CV                   | 219 | 0   | 79  | 298 | ADNIMERGE |
| ST13CV                    | 210 | 0   | 73  | 283 | ADNIMERGE |
| ST15CV                    | 225 | 0   | 55  | 280 | ADNIMERGE |
| ST116TA                   | 171 | 0   | 106 | 277 | ADNIMERGE |
| ST56TA                    | 135 | 0   | 142 | 277 | ADNIMERGE |
| MCSUVRWM3                 | 220 | 0   | 56  | 276 | ADNIMERGE |
| TYR                       | 40  | 0   | 234 | 274 | ADNIMERGE |
| CTX_LH_PARACENTRAL_VOLUME | 257 | 0   | 17  | 274 | ADNIMERGE |



|                                  |     |     |     |     |           |
|----------------------------------|-----|-----|-----|-----|-----------|
| CTX_RH_TRANSVERSETEMPORAL_VOLUME | 191 | 0   | 73  | 264 | ADNIMERGE |
| LEFT_LATERAL_VENTRICLE_SUVR      | 126 | 0   | 135 | 261 | ADNIMERGE |
| ST71SV                           | 257 | 0   | 3   | 260 | ADNIMERGE |
| ST72TA                           | 195 | 0   | 59  | 254 | ADNIMERGE |
| CTX_RH_PERICALCARINE_VOLUME      | 179 | 0   | 70  | 249 | ADNIMERGE |
| MPACCTRAILSB                     | 241 | 0   | 0   | 241 | ADNIMERGE |
| MPACCTRAILSB.BL                  | 241 | 0   | 0   | 241 | ADNIMERGE |
| RIGHT_LATERAL_VENTRICLE_SUVR     | 125 | 0   | 113 | 238 | ADNIMERGE |
| ST43CV                           | 226 | 0   | 9   | 235 | ADNIMERGE |
| MOCA                             | 231 | 0   | 2   | 233 | ADNIMERGE |
| TOTAL13                          | 227 | 0   | 1   | 228 | ADNIMERGE |
| ADAS13                           | 227 | 0   | 1   | 228 | ADNIMERGE |
| ADAS13.BL                        | 227 | 0   | 1   | 228 | ADNIMERGE |
| ADNI_MEM                         | 224 | 0   | 4   | 228 | ADNIMERGE |
| FDG.BL                           | 220 | 0   | 5   | 225 | ADNIMERGE |
| ST4SV                            | 136 | 0   | 86  | 222 | ADNIMERGE |
| ST83TA                           | 218 | 0   | 4   | 222 | ADNIMERGE |
| RIGHT_PUTAMEN_VOLUME             | 211 | 0   | 10  | 221 | ADNIMERGE |
| CTX_LH_PARAHIPPOCAMPAL_VOLUME    | 218 | 0   | 1   | 219 | ADNIMERGE |
| MPACCDIGIT                       | 217 | 0   | 0   | 217 | ADNIMERGE |
| MPACCDIGIT.BL                    | 217 | 0   | 0   | 217 | ADNIMERGE |
| ST107TA                          | 123 | 0   | 92  | 215 | ADNIMERGE |
| USERDATE2                        | 30  | 183 | 0   | 213 | ADNIMERGE |
| ECOGSPMEM                        | 211 | 0   | 0   | 211 | ADNIMERGE |
| HCI_2014                         | 195 | 0   | 16  | 211 | ADNIMERGE |
| ECOGSPTOTAL                      | 210 | 0   | 0   | 210 | ADNIMERGE |
| PQDATTRA                         | 50  | 8   | 152 | 210 | ADNIMERGE |
| CIR                              | 199 | 7   | 3   | 209 | ADNIMERGE |
| CTX_RH_PARSORBITALIS_VOLUME      | 198 | 0   | 10  | 208 | ADNIMERGE |
| TOTSCORE                         | 206 | 0   | 0   | 206 | ADNIMERGE |
| ADAS11                           | 206 | 0   | 0   | 206 | ADNIMERGE |
| ADAS11.BL                        | 206 | 0   | 0   | 206 | ADNIMERGE |
| ST104CV                          | 190 | 0   | 16  | 206 | ADNIMERGE |
| ST60SA                           | 35  | 1   | 169 | 205 | ADNIMERGE |
| ST24TA                           | 204 | 0   | 0   | 204 | ADNIMERGE |
| ST11SV                           | 203 | 0   | 0   | 203 | ADNIMERGE |

|                                  |     |   |     |     |           |
|----------------------------------|-----|---|-----|-----|-----------|
| ST48CV                           | 155 | 0 | 48  | 203 | ADNIMERGE |
| ST117TS                          | 27  | 0 | 176 | 203 | ADNIMERGE |
| ST121CV                          | 180 | 0 | 21  | 201 | ADNIMERGE |
| ST32TA                           | 199 | 0 | 1   | 200 | ADNIMERGE |
| LDELTOTAL                        | 199 | 0 | 0   | 199 | ADNIMERGE |
| LDELTOTAL.BL                     | 199 | 0 | 0   | 199 | ADNIMERGE |
| LEFT_ACCUMBENS_AREA_VOLUME       | 198 | 0 | 0   | 198 | ADNIMERGE |
| Q4SCORE                          | 198 | 0 | 0   | 198 | ADNIMERGE |
| ADASQ4                           | 198 | 0 | 0   | 198 | ADNIMERGE |
| ADASQ4.BL                        | 198 | 0 | 0   | 198 | ADNIMERGE |
| ENTORHINAL.BL                    | 194 | 0 | 1   | 195 | ADNIMERGE |
| ST15TA                           | 163 | 0 | 31  | 194 | ADNIMERGE |
| ST72TS                           | 46  | 0 | 147 | 193 | ADNIMERGE |
| ENTORHINAL                       | 193 | 0 | 0   | 193 | ADNIMERGE |
| ST70SV                           | 186 | 0 | 6   | 192 | ADNIMERGE |
| CC_POSTERIOR_VOLUME              | 140 | 0 | 51  | 191 | ADNIMERGE |
| PC.AA.C36.3                      | 170 | 0 | 19  | 189 | ADNIMERGE |
| ECOGSPLANG                       | 189 | 0 | 0   | 189 | ADNIMERGE |
| CTX_LH_ENTORHINAL_VOLUME         | 188 | 0 | 0   | 188 | ADNIMERGE |
| CTX_LH_PRECUNEUS_SUVR            | 187 | 0 | 0   | 187 | ADNIMERGE |
| ST74CV                           | 180 | 0 | 5   | 185 | ADNIMERGE |
| CTX_RH_PRECUNEUS_SUVR            | 184 | 0 | 0   | 184 | ADNIMERGE |
| CTX_LH_BANKSSTS_SUVR             | 183 | 0 | 0   | 183 | ADNIMERGE |
| CTX_LH_SUPERIORFRONTAL_SUVR      | 183 | 0 | 0   | 183 | ADNIMERGE |
| CTX_RH_BANKSSTS_SUVR             | 183 | 0 | 0   | 183 | ADNIMERGE |
| CTX_RH_ROSTRALMIDDLEFRONTAL_SUVR | 183 | 0 | 0   | 183 | ADNIMERGE |
| ST83CV                           | 179 | 0 | 4   | 183 | ADNIMERGE |
| CTX_LH_CAUDALMIDDLEFRONTAL_SUVR  | 181 | 0 | 0   | 181 | ADNIMERGE |
| CTX_LH_ROSTRALMIDDLEFRONTAL_SUVR | 181 | 0 | 0   | 181 | ADNIMERGE |
| CTX_RH_SUPERIORFRONTAL_SUVR      | 181 | 0 | 0   | 181 | ADNIMERGE |
| CTX_RH_CAUDALMIDDLEFRONTAL_SUVR  | 180 | 0 | 0   | 180 | ADNIMERGE |
| CTX_RH_ENTORHINAL_VOLUME         | 180 | 0 | 0   | 180 | ADNIMERGE |

|                                  |     |    |     |     |           |
|----------------------------------|-----|----|-----|-----|-----------|
| ST121SA                          | 142 | 0  | 38  | 180 | ADNIMERGE |
| ST43TA                           | 154 | 0  | 24  | 178 | ADNIMERGE |
| CTX_RH_MEDIALORBITOFRONTAL_SUVR  | 178 | 0  | 0   | 178 | ADNIMERGE |
| RIGHT_CHOROID_PLEXUS_SUVR        | 99  | 0  | 79  | 178 | ADNIMERGE |
| CTX_LH_PARSORBITALIS_VOLUME      | 178 | 0  | 0   | 178 | ADNIMERGE |
| ECOGSPVISSPAT                    | 177 | 0  | 0   | 177 | ADNIMERGE |
| CTX_LH_INFERIORPARIETAL_SUVR     | 177 | 0  | 0   | 177 | ADNIMERGE |
| PC.AE.C36.5                      | 137 | 0  | 39  | 176 | ADNIMERGE |
| CTX_LH_INFERIORTEMPORAL_SUVR     | 176 | 0  | 0   | 176 | ADNIMERGE |
| CTX_RH_INFERIORPARIETAL_SUVR     | 176 | 0  | 0   | 176 | ADNIMERGE |
| CTX_RH_LATERALORBITOFRONTAL_SUVR | 176 | 0  | 0   | 176 | ADNIMERGE |
| SUMMARYSUVR_COMPOSITE_REFNORM    | 176 | 0  | 0   | 176 | ADNIMERGE |
| CTX_LH_POSTERIORCINGULATE_SUVR   | 175 | 0  | 0   | 175 | ADNIMERGE |
| ST46TA                           | 84  | 0  | 91  | 175 | ADNIMERGE |
| PUFA                             | 152 | 20 | 3   | 175 | ADNIMERGE |
| ST35TS                           | 43  | 0  | 131 | 174 | ADNIMERGE |
| CTX_LH_LATERALORBITOFRONTAL_SUVR | 173 | 0  | 0   | 173 | ADNIMERGE |
| RAVLT.IMMEDIATE                  | 158 | 12 | 2   | 172 | ADNIMERGE |
| RAVLT.IMMEDIATE.BL               | 158 | 12 | 2   | 172 | ADNIMERGE |
| CTX_RH_SUPERIORPARIETAL_SUVR     | 172 | 0  | 0   | 172 | ADNIMERGE |
| ST105CV                          | 156 | 0  | 15  | 171 | ADNIMERGE |
| Q13TASKA                         | 151 | 1  | 18  | 170 | ADNIMERGE |
| LIMMTOTAL                        | 170 | 0  | 0   | 170 | ADNIMERGE |
| CTX_RH_INFERIORTEMPORAL_SUVR     | 170 | 0  | 0   | 170 | ADNIMERGE |
| ST75SV                           | 166 | 0  | 4   | 170 | ADNIMERGE |
| CTX_LH_MEDIALORBITOFRONTAL_SUVR  | 169 | 0  | 0   | 169 | ADNIMERGE |
| CTX_LH_PERICALCARINE_VOLUME      | 146 | 0  | 23  | 169 | ADNIMERGE |
| CTX_RH_POSTERIORCINGULATE_SUVR   | 168 | 0  | 0   | 168 | ADNIMERGE |
| FAQTOTAL                         | 167 | 0  | 0   | 167 | ADNIMERGE |

|                                      |     |   |   |     |           |
|--------------------------------------|-----|---|---|-----|-----------|
| FAQ                                  | 167 | 0 | 0 | 167 | ADNIMERGE |
| FAQ.BL                               | 167 | 0 | 0 | 167 | ADNIMERGE |
| ST45TA                               | 166 | 0 | 0 | 166 | ADNIMERGE |
| ST24CV                               | 166 | 0 | 0 | 166 | ADNIMERGE |
| ST46CV                               | 165 | 0 | 1 | 166 | ADNIMERGE |
| ST16SV                               | 158 | 0 | 7 | 165 | ADNIMERGE |
| AVTOT6                               | 164 | 0 | 0 | 164 | ADNIMERGE |
| CTX_LH_PARACENTRAL_SUVR              | 164 | 0 | 0 | 164 | ADNIMERGE |
| CTX_LH_SUPERIORPARIETAL_SUVR         | 164 | 0 | 0 | 164 | ADNIMERGE |
| AVTOT5                               | 162 | 1 | 0 | 163 | ADNIMERGE |
| CDRSB                                | 162 | 0 | 0 | 162 | ADNIMERGE |
| CDRSB.BL                             | 162 | 0 | 0 | 162 | ADNIMERGE |
| CTX_RH_ISTHMUSCINGULATE_SUVR         | 162 | 0 | 0 | 162 | ADNIMERGE |
| CTX_RH_PARACENTRAL_SUVR              | 162 | 0 | 0 | 162 | ADNIMERGE |
| CTX_RH_PARSOPERCULARIS_SUVR          | 162 | 0 | 0 | 162 | ADNIMERGE |
| CTX_RH_PARSORBITALIS_SUVR            | 162 | 0 | 0 | 162 | ADNIMERGE |
| CTX_LH_ISTHMUSCINGULATE_SUVR         | 161 | 0 | 0 | 161 | ADNIMERGE |
| CTX_LH_PARSTRIANGULARIS_SUVR         | 161 | 0 | 0 | 161 | ADNIMERGE |
| CTX_LH_ROSTRALANTERIORCINGULATE_SUVR | 161 | 0 | 0 | 161 | ADNIMERGE |
| CTX_LH_SUPRAMARGINAL_SUVR            | 161 | 0 | 0 | 161 | ADNIMERGE |
| CTX_RH_ROSTRALANTERIORCINGULATE_SUVR | 161 | 0 | 0 | 161 | ADNIMERGE |
| ADNI_EF                              | 160 | 0 | 0 | 160 | ADNIMERGE |
| CTX_LH_MIDDLETEMPORAL_SUVR           | 160 | 0 | 0 | 160 | ADNIMERGE |
| CTX_LH_PARSOPERCULARIS_SUVR          | 160 | 0 | 0 | 160 | ADNIMERGE |
| CTX_RH_FUSIFORM_SUVR                 | 160 | 0 | 0 | 160 | ADNIMERGE |
| CTX_LH_PARSTRIANGULARIS_VOLUME       | 160 | 0 | 0 | 160 | ADNIMERGE |
| TOTFA                                | 152 | 8 | 0 | 160 | ADNIMERGE |
| CTX_LH_PARSORBITALIS_SUVR            | 159 | 0 | 0 | 159 | ADNIMERGE |
| CTX_RH_LATERALOCIPITAL_SUVR          | 159 | 0 | 0 | 159 | ADNIMERGE |

|                                     |     |    |     |     |           |
|-------------------------------------|-----|----|-----|-----|-----------|
| FAW6                                | 145 | 10 | 4   | 159 | ADNIMERGE |
| CTX_RH_PARSTRIANGULARIS_SUVR        | 158 | 0  | 0   | 158 | ADNIMERGE |
| CTX_RH_SUPRAMARGINAL_SUVR           | 158 | 0  | 0   | 158 | ADNIMERGE |
| CTX_LH_FUSIFORM_SUVR                | 157 | 0  | 0   | 157 | ADNIMERGE |
| MCSUVCERE                           | 157 | 0  | 0   | 157 | ADNIMERGE |
| VLDL.D                              | 95  | 46 | 16  | 157 | ADNIMERGE |
| ST59TS                              | 39  | 0  | 118 | 157 | ADNIMERGE |
| CTX_LH_SUPERIORETEMPORAL_SUVR       | 156 | 0  | 0   | 156 | ADNIMERGE |
| CTX_RH_PERICALCARINE_SUVR           | 155 | 0  | 0   | 155 | ADNIMERGE |
| SFA                                 | 149 | 6  | 0   | 155 | ADNIMERGE |
| CTX_LH_INSULA_SUVR                  | 154 | 0  | 0   | 154 | ADNIMERGE |
| CTX_RH_MIDDLETEMPORAL_SUVR          | 154 | 0  | 0   | 154 | ADNIMERGE |
| CTX_RH_POSTCENTRAL_SUVR             | 154 | 0  | 0   | 154 | ADNIMERGE |
| CTX_LH_POSTCENTRAL_SUVR             | 153 | 0  | 0   | 153 | ADNIMERGE |
| CTX_RH_CAUDALANTERIORCINGULATE_SUVR | 153 | 0  | 0   | 153 | ADNIMERGE |
| SUMMARYSUVR_WHOLECEREBNORM          | 153 | 0  | 0   | 153 | ADNIMERGE |
| S.VLDL.CE                           | 140 | 13 | 0   | 153 | ADNIMERGE |
| PC.AA.C34.4                         | 133 | 18 | 2   | 153 | ADNIMERGE |
| CTX_RH_INSULA_SUVR                  | 152 | 0  | 0   | 152 | ADNIMERGE |
| CTX_RH_PRECENTRAL_SUVR              | 152 | 0  | 0   | 152 | ADNIMERGE |
| CTX_RH_FRONTALPOLE_SUVR             | 151 | 0  | 0   | 151 | ADNIMERGE |
| CTX_RH_UNKNOWN_VOLUME               | 151 | 0  | 0   | 151 | ADNIMERGE |
| S.VLDL.C                            | 134 | 17 | 0   | 151 | ADNIMERGE |
| CTX_RH_SUPERIORETEMPORAL_SUVR       | 150 | 0  | 0   | 150 | ADNIMERGE |
| CTX_LH_PERICALCARINE_SUVR           | 149 | 0  | 0   | 149 | ADNIMERGE |
| CTX_LH_PRECENTRAL_SUVR              | 149 | 0  | 0   | 149 | ADNIMERGE |
| CTX_RH_CUNEUS_SUVR                  | 149 | 0  | 0   | 149 | ADNIMERGE |
| TG.PG                               | 89  | 57 | 3   | 149 | ADNIMERGE |
| S.VLDL.FC                           | 123 | 26 | 0   | 149 | ADNIMERGE |
| MUFA                                | 132 | 17 | 0   | 149 | ADNIMERGE |

|                                     |     |    |    |     |           |
|-------------------------------------|-----|----|----|-----|-----------|
| CTX_LH_FRONTALPOLE_SUVR             | 148 | 0  | 0  | 148 | ADNIMERGE |
| M.VLDL.C                            | 118 | 30 | 0  | 148 | ADNIMERGE |
| M.VLDL.CE                           | 128 | 20 | 0  | 148 | ADNIMERGE |
| CTX_LH_LATERALOCIPITAL_SUVR         | 147 | 0  | 0  | 147 | ADNIMERGE |
| CTX_RH_LINGUAL_SUVR                 | 147 | 0  | 0  | 147 | ADNIMERGE |
| VLDL.C                              | 129 | 18 | 0  | 147 | ADNIMERGE |
| CTX_LH_CUNEUS_SUVR                  | 146 | 0  | 0  | 146 | ADNIMERGE |
| CTX_RH_TRANSVERSETEMPORAL_SUVR      | 144 | 0  | 0  | 144 | ADNIMERGE |
| CTX_LH_TRANSVERSETEMPORAL_SUVR      | 144 | 0  | 0  | 144 | ADNIMERGE |
| S.VLDL.L                            | 114 | 30 | 0  | 144 | ADNIMERGE |
| LA                                  | 144 | 0  | 0  | 144 | ADNIMERGE |
| FRONTAL_SUVR                        | 143 | 0  | 0  | 143 | ADNIMERGE |
| LEFT_HIPPOCAMPUS_SUVR               | 137 | 0  | 6  | 143 | ADNIMERGE |
| CTX_LH_LINGUAL_SUVR                 | 142 | 0  | 0  | 142 | ADNIMERGE |
| S.VLDL.PL                           | 112 | 30 | 0  | 142 | ADNIMERGE |
| Q1SCORE                             | 141 | 0  | 0  | 141 | ADNIMERGE |
| ECOGSPPLAN                          | 141 | 0  | 0  | 141 | ADNIMERGE |
| CTX_LH_CAUDALANTERIORCINGULATE_SUVR | 141 | 0  | 0  | 141 | ADNIMERGE |
| PARIETAL_SUVR                       | 140 | 0  | 0  | 140 | ADNIMERGE |
| FAW3                                | 140 | 0  | 0  | 140 | ADNIMERGE |
| ST3SV                               | 100 | 0  | 39 | 139 | ADNIMERGE |
| RIGHT_ACCUMBENS_AREA_SUVR           | 139 | 0  | 0  | 139 | ADNIMERGE |
| COMPOSITE_SUVR                      | 139 | 0  | 0  | 139 | ADNIMERGE |
| S.VLDL.P                            | 108 | 31 | 0  | 139 | ADNIMERGE |
| M.LDL.TG                            | 135 | 4  | 0  | 139 | ADNIMERGE |
| S.LDL.TG                            | 126 | 13 | 0  | 139 | ADNIMERGE |
| AVTOT4                              | 138 | 0  | 0  | 138 | ADNIMERGE |
| ECOGSPORGAN                         | 138 | 0  | 0  | 138 | ADNIMERGE |
| ACI                                 | 138 | 0  | 0  | 138 | ADNIMERGE |
| XXL.VLDL.CE                         | 120 | 18 | 0  | 138 | ADNIMERGE |
| XL.HDL.TG                           | 138 | 0  | 0  | 138 | ADNIMERGE |
| MEAN                                | 136 | 0  | 1  | 137 | ADNIMERGE |
| LEFT_ACCUMBENS_AREA_SUVR            | 137 | 0  | 0  | 137 | ADNIMERGE |
| TEMPORAL_SUVR                       | 137 | 0  | 0  | 137 | ADNIMERGE |

|                                        |     |    |    |     |           |
|----------------------------------------|-----|----|----|-----|-----------|
| PTRTYR                                 | 93  | 0  | 43 | 136 | ADNIMERGE |
| CTX_RH_ROSTRALANTERIORCINGULATE_VOLUME | 131 | 0  | 5  | 136 | ADNIMERGE |
| RIGHT_HIPPOCAMPUS_SUVR                 | 135 | 0  | 1  | 136 | ADNIMERGE |
| M.VLDL.TG                              | 93  | 42 | 0  | 135 | ADNIMERGE |
| CTX_LH_TRANSVERSETEMPORAL_VOLUME       | 135 | 0  | 0  | 135 | ADNIMERGE |
| XS.VLDL.P                              | 135 | 0  | 0  | 135 | ADNIMERGE |
| XS.VLDL.L                              | 135 | 0  | 0  | 135 | ADNIMERGE |
| REMNANT.C                              | 135 | 0  | 0  | 135 | ADNIMERGE |
| LEFT_INF_LAT_VENT_SUVR                 | 133 | 0  | 1  | 134 | ADNIMERGE |
| M.VLDL.P                               | 94  | 40 | 0  | 134 | ADNIMERGE |
| L.LDL.TG                               | 133 | 1  | 0  | 134 | ADNIMERGE |
| HDL.TG                                 | 120 | 14 | 0  | 134 | ADNIMERGE |
| ST2SV                                  | 130 | 0  | 3  | 133 | ADNIMERGE |
| AVDEL30MIN                             | 133 | 0  | 0  | 133 | ADNIMERGE |
| M.VLDL.L                               | 94  | 39 | 0  | 133 | ADNIMERGE |
| M.VLDL.PL                              | 94  | 39 | 0  | 133 | ADNIMERGE |
| APOB.APOA1                             | 116 | 17 | 0  | 133 | ADNIMERGE |
| ST47TA                                 | 98  | 0  | 34 | 132 | ADNIMERGE |
| CINGULATE_SUVR                         | 132 | 0  | 0  | 132 | ADNIMERGE |
| XL.VLDL.L                              | 101 | 31 | 0  | 132 | ADNIMERGE |
| APOB                                   | 127 | 5  | 0  | 132 | ADNIMERGE |
| XS.VLDL.FC                             | 132 | 0  | 0  | 132 | ADNIMERGE |
| ECOGSPDIVATT                           | 131 | 0  | 0  | 131 | ADNIMERGE |
| ST9SV                                  | 27  | 32 | 72 | 131 | ADNIMERGE |
| XXL.VLDL.C                             | 112 | 19 | 0  | 131 | ADNIMERGE |
| LDL.TG                                 | 131 | 0  | 0  | 131 | ADNIMERGE |
| ST44TA                                 | 103 | 0  | 27 | 130 | ADNIMERGE |
| XL.VLDL.FC                             | 107 | 23 | 0  | 130 | ADNIMERGE |
| IDL.FC                                 | 117 | 0  | 13 | 130 | ADNIMERGE |
| TRABSCOR                               | 129 | 0  | 0  | 129 | ADNIMERGE |
| TRABSCOR.BL                            | 129 | 0  | 0  | 129 | ADNIMERGE |
| ST119TA                                | 129 | 0  | 0  | 129 | ADNIMERGE |
| XL.VLDL.P                              | 99  | 30 | 0  | 129 | ADNIMERGE |
| XL.VLDL.PL                             | 103 | 26 | 0  | 129 | ADNIMERGE |
| M.HDL.TG                               | 105 | 24 | 0  | 129 | ADNIMERGE |
| PUFA.FA                                | 97  | 26 | 6  | 129 | ADNIMERGE |
| AVTOT3                                 | 122 | 6  | 0  | 128 | ADNIMERGE |
| MEDIAN                                 | 127 | 0  | 1  | 128 | ADNIMERGE |

|                                  |     |    |    |     |           |
|----------------------------------|-----|----|----|-----|-----------|
| RIGHT_PUTAMEN_SUVR               | 128 | 0  | 0  | 128 | ADNIMERGE |
| XL.VLDL.TG                       | 98  | 30 | 0  | 128 | ADNIMERGE |
| L.VLDL.CE                        | 94  | 34 | 0  | 128 | ADNIMERGE |
| L.VLDL.FC                        | 96  | 32 | 0  | 128 | ADNIMERGE |
| FAW6.FA                          | 97  | 28 | 3  | 128 | ADNIMERGE |
| PC.AA.C34.1                      | 128 | 0  | 0  | 128 | ADNIMERGE |
| LA.FA                            | 108 | 19 | 1  | 128 | ADNIMERGE |
| ST55TA                           | 114 | 0  | 13 | 127 | ADNIMERGE |
| S.HDL.TG                         | 90  | 36 | 1  | 127 | ADNIMERGE |
| ST74TA                           | 123 | 0  | 4  | 127 | ADNIMERGE |
| OPTIC_CHIASM_SUVR                | 123 | 0  | 4  | 127 | ADNIMERGE |
| SERUM.TG                         | 95  | 32 | 0  | 127 | ADNIMERGE |
| XS.VLDL.PL                       | 127 | 0  | 0  | 127 | ADNIMERGE |
| IDL.TG                           | 115 | 12 | 0  | 127 | ADNIMERGE |
| PLA                              | 29  | 0  | 97 | 126 | ADNIMERGE |
| LEFT_PUTAMEN_SUVR                | 126 | 0  | 0  | 126 | ADNIMERGE |
| XL.VLDL.CE                       | 101 | 25 | 0  | 126 | ADNIMERGE |
| M.VLDL.FC                        | 93  | 33 | 0  | 126 | ADNIMERGE |
| M.LDL.PL                         | 126 | 0  | 0  | 126 | ADNIMERGE |
| CTX_RH_PARAHIPPOCAMPAL_SUVR      | 126 | 0  | 0  | 126 | ADNIMERGE |
| CTX_LH_PARAHIPPOCAMPAL_SUVR      | 126 | 0  | 0  | 126 | ADNIMERGE |
| LEFT_CEREBRAL_WHITE_MATTER_SUVR  | 125 | 0  | 0  | 125 | ADNIMERGE |
| RIGHT_CEREBRAL_WHITE_MATTER_SUVR | 125 | 0  | 0  | 125 | ADNIMERGE |
| L.VLDL.C                         | 92  | 33 | 0  | 125 | ADNIMERGE |
| S.VLDL.TG                        | 89  | 35 | 1  | 125 | ADNIMERGE |
| VLDL.TG                          | 90  | 35 | 0  | 125 | ADNIMERGE |
| XS.VLDL.C                        | 125 | 0  | 0  | 125 | ADNIMERGE |
| CTX_LH_UNKNOWN_SUVR              | 125 | 0  | 0  | 125 | ADNIMERGE |
| ERODED_SUBCORTICALWM_SUVR        | 124 | 0  | 0  | 124 | ADNIMERGE |
| XXL.VLDL.PL                      | 104 | 20 | 0  | 124 | ADNIMERGE |
| MUFA.FA                          | 91  | 33 | 0  | 124 | ADNIMERGE |
| CTX_RH_UNKNOWN_SUVR              | 124 | 0  | 0  | 124 | ADNIMERGE |
| LEFT_CAUDATE_SUVR                | 124 | 0  | 0  | 124 | ADNIMERGE |
| RIGHT_CAUDATE_SUVR               | 124 | 0  | 0  | 124 | ADNIMERGE |
| ST73TA                           | 24  | 0  | 99 | 123 | ADNIMERGE |



|                                |     |    |    |     |           |
|--------------------------------|-----|----|----|-----|-----------|
| XS.VLDL.CE                     | 123 | 0  | 0  | 123 | ADNIMERGE |
| RIGHT_INF_LAT_VENT_SUVR        | 123 | 0  | 0  | 123 | ADNIMERGE |
| L.VLDL.PL                      | 90  | 33 | 0  | 123 | ADNIMERGE |
| S.IDL.PL                       | 123 | 0  | 0  | 123 | ADNIMERGE |
| LEFT_THALAMUS_PROPER_SUVR      | 123 | 0  | 0  | 123 | ADNIMERGE |
| RIGHT_THALAMUS_PROPER_SUVR     | 123 | 0  | 0  | 123 | ADNIMERGE |
| ST60TA                         | 122 | 0  | 0  | 122 | ADNIMERGE |
| XL.VLDL.C                      | 98  | 24 | 0  | 122 | ADNIMERGE |
| L.VLDL.P                       | 88  | 34 | 0  | 122 | ADNIMERGE |
| XS.VLDL.TG                     | 94  | 28 | 0  | 122 | ADNIMERGE |
| XXL.VLDL.P                     | 103 | 18 | 0  | 121 | ADNIMERGE |
| XXL.VLDL.L                     | 103 | 18 | 0  | 121 | ADNIMERGE |
| L.VLDL.L                       | 87  | 34 | 0  | 121 | ADNIMERGE |
| L.VLDL.TG                      | 87  | 34 | 0  | 121 | ADNIMERGE |
| RIGHT_PALLIDUM_SUVR            | 121 | 0  | 0  | 121 | ADNIMERGE |
| LEFT_VESSEL_SUVR               | 121 | 0  | 0  | 121 | ADNIMERGE |
| DX                             | 120 | 0  | 0  | 120 | ADNIMERGE |
| ST62CV                         | 120 | 0  | 0  | 120 | ADNIMERGE |
| LEFT_CEREBELLUM_CORTEX_SUVR    | 120 | 0  | 0  | 120 | ADNIMERGE |
| PC.AA.C36.2                    | 76  | 0  | 43 | 119 | ADNIMERGE |
| XXL.VLDL.TG                    | 101 | 18 | 0  | 119 | ADNIMERGE |
| IDL.P                          | 119 | 0  | 0  | 119 | ADNIMERGE |
| RIGHT_CEREBELLUM_CORTEX_SUVR   | 119 | 0  | 0  | 119 | ADNIMERGE |
| RIGHT_VESSEL_SUVR              | 119 | 0  | 0  | 119 | ADNIMERGE |
| ST104TA                        | 118 | 0  | 0  | 118 | ADNIMERGE |
| ST129TA                        | 118 | 0  | 0  | 118 | ADNIMERGE |
| CTX_RH_PARSTRIANGULARIS_VOLUME | 118 | 0  | 0  | 118 | ADNIMERGE |
| PC.AA.C38.4                    | 91  | 20 | 7  | 118 | ADNIMERGE |
| XXL.VLDL.FC                    | 96  | 22 | 0  | 118 | ADNIMERGE |
| IDL.L                          | 118 | 0  | 0  | 118 | ADNIMERGE |
| LEFT_PALLIDUM_SUVR             | 118 | 0  | 0  | 118 | ADNIMERGE |
| NON_WM_HYPOINTENSITIES_SUVR    | 118 | 0  | 0  | 118 | ADNIMERGE |
| RIGHT_VENTRALDC_SUVR           | 118 | 0  | 0  | 118 | ADNIMERGE |
| ST115TA                        | 105 | 0  | 12 | 117 | ADNIMERGE |

|                          |     |    |    |     |           |
|--------------------------|-----|----|----|-----|-----------|
| IDL.CE                   | 117 | 0  | 0  | 117 | ADNIMERGE |
| LEFT_VENTRALDC_SUVR      | 117 | 0  | 0  | 117 | ADNIMERGE |
| MAX                      | 116 | 0  | 0  | 116 | ADNIMERGE |
| IDL.C                    | 116 | 0  | 0  | 116 | ADNIMERGE |
| L.LDL.P                  | 115 | 0  | 0  | 115 | ADNIMERGE |
| ST93TA                   | 106 | 0  | 8  | 114 | ADNIMERGE |
| CTX_LH_UNKNOWN_VOLUME    | 114 | 0  | 0  | 114 | ADNIMERGE |
| IDL.PL                   | 114 | 0  | 0  | 114 | ADNIMERGE |
| L.LDL.FC                 | 114 | 0  | 0  | 114 | ADNIMERGE |
| LEFT_AMYGDALA_SUVR       | 114 | 0  | 0  | 114 | ADNIMERGE |
| CC_CENTRAL_SUVR          | 113 | 0  | 0  | 113 | ADNIMERGE |
| CTX_LH_TEMPORALPOLE_SUVR | 113 | 0  | 0  | 113 | ADNIMERGE |
| CTX_RH_TEMPORALPOLE_SUVR | 113 | 0  | 0  | 113 | ADNIMERGE |
| RIGHT_AMYGDALA_SUVR      | 113 | 0  | 0  | 113 | ADNIMERGE |
| AVTOT2                   | 111 | 1  | 0  | 112 | ADNIMERGE |
| S.LDL.P                  | 112 | 0  | 0  | 112 | ADNIMERGE |
| MMSCORE                  | 111 | 0  | 0  | 111 | ADNIMERGE |
| MMSE                     | 111 | 0  | 0  | 111 | ADNIMERGE |
| MMSE.BL                  | 111 | 0  | 0  | 111 | ADNIMERGE |
| VENTRICLE_4TH_SUVR       | 111 | 0  | 0  | 111 | ADNIMERGE |
| L.LDL.L                  | 111 | 0  | 0  | 111 | ADNIMERGE |
| L.LDL.PL                 | 111 | 0  | 0  | 111 | ADNIMERGE |
| DHA                      | 111 | 0  | 0  | 111 | ADNIMERGE |
| S.LDL.L                  | 110 | 0  | 0  | 110 | ADNIMERGE |
| L.LDL.CE                 | 110 | 0  | 0  | 110 | ADNIMERGE |
| CC_MID_POSTERIOR_SUVR    | 110 | 0  | 0  | 110 | ADNIMERGE |
| ST36TA                   | 101 | 0  | 8  | 109 | ADNIMERGE |
| PC.AA.C36.6              | 105 | 4  | 0  | 109 | ADNIMERGE |
| CC_MID_ANTERIOR_SUVR     | 109 | 0  | 0  | 109 | ADNIMERGE |
| L.LDL.C                  | 108 | 0  | 0  | 108 | ADNIMERGE |
| ST24SA                   | 104 | 3  | 0  | 107 | ADNIMERGE |
| GP                       | 90  | 17 | 0  | 107 | ADNIMERGE |
| M.LDL.FC                 | 107 | 0  | 0  | 107 | ADNIMERGE |
| CC_ANTERIOR_SUVR         | 107 | 0  | 0  | 107 | ADNIMERGE |
| ST106CV                  | 105 | 0  | 1  | 106 | ADNIMERGE |
| LEFT_CHOROID_PLEXUS_SUVR | 87  | 0  | 19 | 106 | ADNIMERGE |

|                                    |     |    |    |     |           |
|------------------------------------|-----|----|----|-----|-----------|
| M.LDL.P                            | 106 | 0  | 0  | 106 | ADNIMERGE |
| PC.AA.C32.1                        | 105 | 0  | 0  | 105 | ADNIMERGE |
| S.LDL.FC                           | 105 | 0  | 0  | 105 | ADNIMERGE |
| LDL.C                              | 105 | 0  | 0  | 105 | ADNIMERGE |
| COMPOSITE_REF_SUVR                 | 105 | 0  | 0  | 105 | ADNIMERGE |
| M.LDL.L                            | 104 | 0  | 0  | 104 | ADNIMERGE |
| CC_POSTERIOR_SUVR                  | 104 | 0  | 0  | 104 | ADNIMERGE |
| WM_HYPOINTENSITIES_SUVR            | 104 | 0  | 0  | 104 | ADNIMERGE |
| BRAIN_STEM_SUVR                    | 104 | 0  | 0  | 104 | ADNIMERGE |
| ST5SV                              | 67  | 0  | 36 | 103 | ADNIMERGE |
| ST39TA                             | 102 | 0  | 1  | 103 | ADNIMERGE |
| CTX_LH_ENTORHINAL_SUVR             | 103 | 0  | 0  | 103 | ADNIMERGE |
| CALLDATE                           | 46  | 16 | 39 | 101 | ADNIMERGE |
| HCI                                | 99  | 0  | 2  | 101 | ADNIMERGE |
| CTX_RH_ENTORHINAL_SUVR             | 101 | 0  | 0  | 101 | ADNIMERGE |
| ST48TA                             | 81  | 0  | 19 | 100 | ADNIMERGE |
| M.LDL.C                            | 100 | 0  | 0  | 100 | ADNIMERGE |
| S.LDL.C                            | 100 | 0  | 0  | 100 | ADNIMERGE |
| ST130TA                            | 99  | 0  | 0  | 99  | ADNIMERGE |
| LEFT_CEREBELLUM_WHITE_MATTER_SUVR  | 99  | 0  | 0  | 99  | ADNIMERGE |
| RIGHT_CEREBELLUM_WHITE_MATTER_SUVR | 99  | 0  | 0  | 99  | ADNIMERGE |
| ST34TA                             | 97  | 0  | 0  | 97  | ADNIMERGE |
| S.LDL.CE                           | 97  | 0  | 0  | 97  | ADNIMERGE |
| ST14CV                             | 96  | 0  | 0  | 96  | ADNIMERGE |
| Q8SCORE                            | 95  | 0  | 0  | 95  | ADNIMERGE |
| PHS                                | 95  | 0  | 0  | 95  | ADNIMERGE |
| M.LDL.CE                           | 95  | 0  | 0  | 95  | ADNIMERGE |
| CSFVOL                             | 55  | 0  | 39 | 94  | ADNIMERGE |
| FAQFORM                            | 94  | 0  | 0  | 94  | ADNIMERGE |
| ST6SV                              | 73  | 0  | 19 | 92  | ADNIMERGE |
| ST23TA                             | 92  | 0  | 0  | 92  | ADNIMERGE |
| ST68SV                             | 48  | 0  | 42 | 90  | ADNIMERGE |
| UNSAT                              | 82  | 8  | 0  | 90  | ADNIMERGE |
| RAVLT.LEARNING                     | 89  | 0  | 0  | 89  | ADNIMERGE |
| RAVLT.LEARNING.BL                  | 89  | 0  | 0  | 89  | ADNIMERGE |
| ST62TA                             | 88  | 0  | 0  | 88  | ADNIMERGE |

|                            |    |   |    |    |           |
|----------------------------|----|---|----|----|-----------|
| CDGLOBAL                   | 88 | 0 | 0  | 88 | ADNIMERGE |
| RIGHT_CAUDATE_VOLUME       | 85 | 0 | 3  | 88 | ADNIMERGE |
| CSF                        | 53 | 0 | 34 | 87 | ADNIMERGE |
| CATANIMSC                  | 87 | 0 | 0  | 87 | ADNIMERGE |
| RAVLT.PERC.FORGETTING      | 86 | 0 | 0  | 86 | ADNIMERGE |
| RAVLT.PERC.FORGETTING.BL   | 86 | 0 | 0  | 86 | ADNIMERGE |
| CTX_RH_TEMPORALPOLE_VOLUME | 86 | 0 | 0  | 86 | ADNIMERGE |
| ST47CV                     | 84 | 0 | 2  | 86 | ADNIMERGE |
| PC.AA.C36.4                | 86 | 0 | 0  | 86 | ADNIMERGE |
| CEREBELLUMGREYMATTER_SUV   | 84 | 0 | 0  | 84 | ADNIMERGE |
| AVDELTOT                   | 82 | 0 | 0  | 82 | ADNIMERGE |
| LDELCTE                    | 82 | 0 | 0  | 82 | ADNIMERGE |
| CTX_RH_FRONTALPOLE_VOLUME  | 82 | 0 | 0  | 82 | ADNIMERGE |
| LEFT_CAUDATE_VOLUME        | 76 | 0 | 3  | 79 | ADNIMERGE |
| ST105TA                    | 78 | 0 | 0  | 78 | ADNIMERGE |
| APOE4                      | 77 | 0 | 0  | 77 | ADNIMERGE |
| ST57TS                     | 32 | 0 | 45 | 77 | ADNIMERGE |
| PRETEMP                    | 1  | 0 | 76 | 77 | ADNIMERGE |
| ST49TS                     | 76 | 0 | 0  | 76 | ADNIMERGE |
| ST95TA                     | 76 | 0 | 0  | 76 | ADNIMERGE |
| ASN                        | 50 | 0 | 23 | 73 | ADNIMERGE |
| ST106TA                    | 70 | 0 | 1  | 71 | ADNIMERGE |
| ST84CV                     | 70 | 0 | 1  | 71 | ADNIMERGE |
| MMFLAGDL                   | 69 | 0 | 0  | 69 | ADNIMERGE |
| ST84SA                     | 64 | 0 | 4  | 68 | ADNIMERGE |
| PE.16.0.22.6               | 62 | 1 | 4  | 67 | ADNIMERGE |
| PLASMA_NFL                 | 63 | 2 | 0  | 65 | ADNIMERGE |
| PLAVOL                     | 27 | 0 | 38 | 65 | ADNIMERGE |
| BNTSPONT                   | 62 | 0 | 0  | 62 | ADNIMERGE |
| ST121TA                    | 62 | 0 | 0  | 62 | ADNIMERGE |
| CTX_LH_TEMPORALPOLE_VOLUME | 62 | 0 | 0  | 62 | ADNIMERGE |
| ST98TA                     | 55 | 0 | 6  | 61 | ADNIMERGE |
| ST108TS                    | 61 | 0 | 0  | 61 | ADNIMERGE |
| PC.AA.C38.6                | 61 | 0 | 0  | 61 | ADNIMERGE |
| AVTOTB                     | 60 | 0 | 0  | 60 | ADNIMERGE |
| BNTPHON                    | 60 | 0 | 0  | 60 | ADNIMERGE |
| BNTTOTAL                   | 60 | 0 | 0  | 60 | ADNIMERGE |
| MMTREEDL                   | 60 | 0 | 0  | 60 | ADNIMERGE |

|                                       |    |    |    |    |           |
|---------------------------------------|----|----|----|----|-----------|
| FAQFINAN                              | 60 | 0  | 0  | 60 | ADNIMERGE |
| ST114TA                               | 59 | 0  | 0  | 59 | ADNIMERGE |
| PC.AA.C36.5                           | 59 | 0  | 0  | 59 | ADNIMERGE |
| MMBALLDL                              | 58 | 0  | 0  | 58 | ADNIMERGE |
| CTX_LH_CAUDALANTERIORCINGULATE_VOLUME | 57 | 0  | 0  | 57 | ADNIMERGE |
| PE.P.16.0.22.6                        | 57 | 0  | 0  | 57 | ADNIMERGE |
| AVTOT1                                | 56 | 0  | 0  | 56 | ADNIMERGE |
| WHOLECEREBELLUM_SUVR                  | 56 | 0  | 0  | 56 | ADNIMERGE |
| MODE                                  | 55 | 0  | 0  | 55 | ADNIMERGE |
| S.HDL.CE                              | 55 | 0  | 0  | 55 | ADNIMERGE |
| NPISCORE                              | 54 | 0  | 0  | 54 | ADNIMERGE |
| ECOGPTMEM                             | 54 | 0  | 0  | 54 | ADNIMERGE |
| ST73CV                                | 54 | 0  | 0  | 54 | ADNIMERGE |
| ST25SA                                | 47 | 0  | 7  | 54 | ADNIMERGE |
| S.HDL.PL                              | 50 | 4  | 0  | 54 | ADNIMERGE |
| PE.P.18.0.20.5                        | 53 | 0  | 0  | 53 | ADNIMERGE |
| ECOGPTTOTAL                           | 53 | 0  | 0  | 53 | ADNIMERGE |
| PE.18.0.20.5                          | 52 | 0  | 1  | 53 | ADNIMERGE |
| NPITOTAL                              | 52 | 0  | 0  | 52 | ADNIMERGE |
| ECOGPTPLAN                            | 51 | 0  | 0  | 51 | ADNIMERGE |
| MIN                                   | 50 | 0  | 0  | 50 | ADNIMERGE |
| ST54TS                                | 48 | 0  | 1  | 49 | ADNIMERGE |
| S.HDL.C                               | 49 | 0  | 0  | 49 | ADNIMERGE |
| AVDELEERR2                            | 48 | 0  | 0  | 48 | ADNIMERGE |
| ST114TS                               | 48 | 0  | 0  | 48 | ADNIMERGE |
| ST115TS                               | 44 | 0  | 0  | 44 | ADNIMERGE |
| ST52TS                                | 44 | 0  | 0  | 44 | ADNIMERGE |
| CDATE                                 | 23 | 20 | 0  | 43 | ADNIMERGE |
| ST36TS                                | 38 | 0  | 5  | 43 | ADNIMERGE |
| ST94TS                                | 29 | 0  | 14 | 43 | ADNIMERGE |
| ST107TS                               | 43 | 0  | 0  | 43 | ADNIMERGE |
| CTX_LH_FRONTALPOLE_VOLUME             | 42 | 0  | 0  | 42 | ADNIMERGE |
| ST111TS                               | 41 | 0  | 0  | 41 | ADNIMERGE |
| ST60CV                                | 41 | 0  | 0  | 41 | ADNIMERGE |
| KYNURENINE                            | 15 | 8  | 18 | 41 | ADNIMERGE |
| S.HDL.P                               | 40 | 0  | 0  | 40 | ADNIMERGE |
| THR                                   | 39 | 0  | 0  | 39 | ADNIMERGE |
| CTX_RH_CAUDALANTERIORCINGULATE_VOLUME | 39 | 0  | 0  | 39 | ADNIMERGE |

|                      |    |    |    |    |           |
|----------------------|----|----|----|----|-----------|
| ST43TS               | 15 | 0  | 24 | 39 | ADNIMERGE |
| TRAASCOR             | 38 | 0  | 0  | 38 | ADNIMERGE |
| BNTCPHON             | 38 | 0  | 0  | 38 | ADNIMERGE |
| ST119CV              | 34 | 0  | 4  | 38 | ADNIMERGE |
| ANARTERR             | 37 | 0  | 0  | 37 | ADNIMERGE |
| ECOGPTVISSPAT        | 37 | 0  | 0  | 37 | ADNIMERGE |
| ST116TS              | 28 | 0  | 9  | 37 | ADNIMERGE |
| ST106TS              | 36 | 0  | 0  | 36 | ADNIMERGE |
| MMDATE               | 35 | 0  | 0  | 35 | ADNIMERGE |
| ST58TS               | 32 | 0  | 3  | 35 | ADNIMERGE |
| VENTRICLE_4TH_VOLUME | 26 | 4  | 5  | 35 | ADNIMERGE |
| ST73TS               | 31 | 0  | 3  | 34 | ADNIMERGE |
| AVERRB               | 34 | 0  | 0  | 34 | ADNIMERGE |
| ST97TS               | 34 | 0  | 0  | 34 | ADNIMERGE |
| S.HDL.L              | 34 | 0  | 0  | 34 | ADNIMERGE |
| S.HDL.FC             | 33 | 0  | 0  | 33 | ADNIMERGE |
| ST129TS              | 32 | 0  | 0  | 32 | ADNIMERGE |
| ST105TS              | 22 | 0  | 10 | 32 | ADNIMERGE |
| ST14TS               | 31 | 0  | 0  | 31 | ADNIMERGE |
| GDTOTAL              | 30 | 0  | 0  | 30 | ADNIMERGE |
| ORGAN3               | 30 | 0  | 0  | 30 | ADNIMERGE |
| ECOGPTORGAN          | 30 | 0  | 0  | 30 | ADNIMERGE |
| ST95TS               | 30 | 0  | 0  | 30 | ADNIMERGE |
| ST38TS               | 30 | 0  | 0  | 30 | ADNIMERGE |
| ORGAN2               | 29 | 0  | 0  | 29 | ADNIMERGE |
| ST48TS               | 29 | 0  | 0  | 29 | ADNIMERGE |
| ST13TS               | 17 | 0  | 12 | 29 | ADNIMERGE |
| ST25CV               | 29 | 0  | 0  | 29 | ADNIMERGE |
| ECOGPTLANG           | 28 | 0  | 0  | 28 | ADNIMERGE |
| FFLUENCY             | 28 | 0  | 0  | 28 | ADNIMERGE |
| CLIDATE              | 25 | 2  | 0  | 27 | ADNIMERGE |
| ECOGPTDIVATT         | 27 | 0  | 0  | 27 | ADNIMERGE |
| GDMEMORY             | 26 | 0  | 0  | 26 | ADNIMERGE |
| RNATIME              | 10 | 16 | 0  | 26 | ADNIMERGE |
| MONDATE              | 23 | 2  | 0  | 25 | ADNIMERGE |
| POSTTEMP             | 1  | 0  | 24 | 25 | ADNIMERGE |
| VISSPAT1             | 23 | 0  | 0  | 23 | ADNIMERGE |
| ST54TA               | 23 | 0  | 0  | 23 | ADNIMERGE |
| ST50TS               | 22 | 0  | 0  | 22 | ADNIMERGE |
| FAW3.FA              | 22 | 0  | 0  | 22 | ADNIMERGE |
| SARCOSINE            | 13 | 0  | 8  | 21 | ADNIMERGE |

|                     |    |   |   |    |           |
|---------------------|----|---|---|----|-----------|
| ALB                 | 20 | 0 | 0 | 20 | ADNIMERGE |
| NPIG                | 19 | 0 | 0 | 19 | ADNIMERGE |
| VISSPAT2            | 19 | 0 | 0 | 19 | ADNIMERGE |
| ST85TS              | 19 | 0 | 0 | 19 | ADNIMERGE |
| ST25TA              | 19 | 0 | 0 | 19 | ADNIMERGE |
| ST84TA              | 19 | 0 | 0 | 19 | ADNIMERGE |
| LDL.D               | 19 | 0 | 0 | 19 | ADNIMERGE |
| RAVLT.FORGETTING    | 18 | 0 | 0 | 18 | ADNIMERGE |
| RAVLT.FORGETTING.BL | 18 | 0 | 0 | 18 | ADNIMERGE |
| BILAVTIME           | 10 | 8 | 0 | 18 | ADNIMERGE |
| BIREDTIME           | 10 | 8 | 0 | 18 | ADNIMERGE |
| BILAVCENT           | 10 | 8 | 0 | 18 | ADNIMERGE |
| BIREDCENT           | 10 | 8 | 0 | 18 | ADNIMERGE |
| CLTIME              | 10 | 8 | 0 | 18 | ADNIMERGE |
| ST130TS             | 17 | 0 | 0 | 17 | ADNIMERGE |
| BILAVFROZ           | 10 | 7 | 0 | 17 | ADNIMERGE |
| BILAVTRNS           | 10 | 7 | 0 | 17 | ADNIMERGE |
| BIREFROZ            | 10 | 7 | 0 | 17 | ADNIMERGE |
| BIREDTRNS           | 10 | 7 | 0 | 17 | ADNIMERGE |
| ST83TS              | 17 | 0 | 0 | 17 | ADNIMERGE |
| MMDAY               | 15 | 0 | 0 | 15 | ADNIMERGE |
| ST46TS              | 15 | 0 | 0 | 15 | ADNIMERGE |
| ST26TS              | 15 | 0 | 0 | 15 | ADNIMERGE |
| DHA.FA              | 15 | 0 | 0 | 15 | ADNIMERGE |
| FHQPROV             | 14 | 0 | 0 | 14 | ADNIMERGE |
| NPIC                | 14 | 0 | 0 | 14 | ADNIMERGE |
| ST24TS              | 14 | 0 | 0 | 14 | ADNIMERGE |
| ST25TS              | 13 | 0 | 0 | 13 | ADNIMERGE |
| ST113TA             | 13 | 0 | 0 | 13 | ADNIMERGE |
| ST14TA              | 10 | 0 | 3 | 13 | ADNIMERGE |
| ST23TS              | 13 | 0 | 0 | 13 | ADNIMERGE |
| ST102TS             | 11 | 0 | 0 | 11 | ADNIMERGE |
| LEFT_VESSEL_VOLUME  | 4  | 0 | 7 | 11 | ADNIMERGE |
| BICSFTIME           | 10 | 0 | 0 | 10 | ADNIMERGE |
| ST121TS             | 10 | 0 | 0 | 10 | ADNIMERGE |
| ST84TS              | 10 | 0 | 0 | 10 | ADNIMERGE |
| BILAVAMT            | 9  | 0 | 0 | 9  | ADNIMERGE |
| ST82TS              | 9  | 0 | 0 | 9  | ADNIMERGE |
| NPII                | 9  | 0 | 0 | 9  | ADNIMERGE |
| BOHBUT              | 9  | 0 | 0 | 9  | ADNIMERGE |

|            |   |   |   |   |           |
|------------|---|---|---|---|-----------|
| BILAVVOL   | 8 | 0 | 0 | 8 | ADNIMERGE |
| BNTSTIM    | 8 | 0 | 0 | 8 | ADNIMERGE |
| SERVOL     | 8 | 0 | 0 | 8 | ADNIMERGE |
| C2         | 6 | 2 | 0 | 8 | ADNIMERGE |
| SFA.FA     | 8 | 0 | 0 | 8 | ADNIMERGE |
| MMFLOOR    | 7 | 0 | 0 | 7 | ADNIMERGE |
| BIREDAMT   | 7 | 0 | 0 | 7 | ADNIMERGE |
| ST109TS    | 7 | 0 | 0 | 7 | ADNIMERGE |
| VBSI       | 7 | 0 | 0 | 7 | ADNIMERGE |
| GDCA.DCA   | 7 | 0 | 0 | 7 | ADNIMERGE |
| TDCA.DCA   | 7 | 0 | 0 | 7 | ADNIMERGE |
| GDCA.CA    | 7 | 0 | 0 | 7 | ADNIMERGE |
| TDCA.CA    | 7 | 0 | 0 | 7 | ADNIMERGE |
| GLCA.CDCA  | 7 | 0 | 0 | 7 | ADNIMERGE |
| TLCA.CDCA  | 7 | 0 | 0 | 7 | ADNIMERGE |
| MMR        | 6 | 0 | 0 | 6 | ADNIMERGE |
| NPID       | 6 | 0 | 0 | 6 | ADNIMERGE |
| SENT_PLA   | 6 | 0 | 0 | 6 | ADNIMERGE |
| TRABERROM  | 6 | 0 | 0 | 6 | ADNIMERGE |
| LAC        | 6 | 0 | 0 | 6 | ADNIMERGE |
| ACE        | 6 | 0 | 0 | 6 | ADNIMERGE |
| ACACE      | 6 | 0 | 0 | 6 | ADNIMERGE |
| APVOLUME   | 5 | 0 | 0 | 5 | ADNIMERGE |
| CLVOLUME   | 5 | 0 | 0 | 5 | ADNIMERGE |
| TRABERRCOM | 5 | 0 | 0 | 5 | ADNIMERGE |
| GLC        | 5 | 0 | 0 | 5 | ADNIMERGE |
| C18.2      | 5 | 0 | 0 | 5 | ADNIMERGE |
| STDEV      | 5 | 0 | 0 | 5 | ADNIMERGE |
| MMO        | 4 | 0 | 0 | 4 | ADNIMERGE |
| GDHAPPY    | 4 | 0 | 0 | 4 | ADNIMERGE |
| VSTEMP     | 4 | 0 | 0 | 4 | ADNIMERGE |
| VSWTUNIT   | 4 | 0 | 0 | 4 | ADNIMERGE |
| VSTMPUNT   | 4 | 0 | 0 | 4 | ADNIMERGE |
| POSTDIABP  | 4 | 0 | 0 | 4 | ADNIMERGE |
| PRESYSTBP  | 4 | 0 | 0 | 4 | ADNIMERGE |
| POSTSYSTBP | 4 | 0 | 0 | 4 | ADNIMERGE |
| RNAVOL     | 4 | 0 | 0 | 4 | ADNIMERGE |
| LDELBEGIN  | 4 | 0 | 0 | 4 | ADNIMERGE |
| LIMMEND    | 4 | 0 | 0 | 4 | ADNIMERGE |
| TIMEEND    | 4 | 0 | 0 | 4 | ADNIMERGE |
| TIMEBEGAN  | 4 | 0 | 0 | 4 | ADNIMERGE |



|                     |   |   |   |   |           |
|---------------------|---|---|---|---|-----------|
| AVDELBEGAN          | 4 | 0 | 0 | 4 | ADNIMERGE |
| USED_CSF            | 4 | 0 | 0 | 4 | ADNIMERGE |
| SENT_CSF            | 4 | 0 | 0 | 4 | ADNIMERGE |
| BIREDVOL            | 4 | 0 | 0 | 4 | ADNIMERGE |
| ST103TS             | 4 | 0 | 0 | 4 | ADNIMERGE |
| ST44TS              | 4 | 0 | 0 | 4 | ADNIMERGE |
| ST8SV               | 4 | 0 | 0 | 4 | ADNIMERGE |
| TMCA_A_B            | 4 | 0 | 0 | 4 | ADNIMERGE |
| DCA.CA              | 4 | 0 | 0 | 4 | ADNIMERGE |
| MMAREA              | 3 | 0 | 0 | 3 | ADNIMERGE |
| MMHOSPIT            | 3 | 0 | 0 | 3 | ADNIMERGE |
| MMREPEAT            | 3 | 0 | 0 | 3 | ADNIMERGE |
| BCENERGY            | 3 | 0 | 0 | 3 | ADNIMERGE |
| BCDPMOOD            | 3 | 0 | 0 | 3 | ADNIMERGE |
| VSBPDIA             | 3 | 0 | 0 | 3 | ADNIMERGE |
| VSBPSYS             | 3 | 0 | 0 | 3 | ADNIMERGE |
| PREDIABP            | 3 | 0 | 0 | 3 | ADNIMERGE |
| ST125SV             | 3 | 0 | 0 | 3 | ADNIMERGE |
| ST66SV              | 3 | 0 | 0 | 3 | ADNIMERGE |
| RIGHT_VESSEL_VOLUME | 3 | 0 | 0 | 3 | ADNIMERGE |
| NPIH                | 3 | 0 | 0 | 3 | ADNIMERGE |
| MEASURE_1           | 3 | 0 | 0 | 3 | ADNIMERGE |
| APGEN1              | 3 | 0 | 0 | 3 | ADNIMERGE |
| PTEDUCAT            | 2 | 0 | 0 | 2 | ADNIMERGE |
| GDENERGY            | 2 | 0 | 0 | 2 | ADNIMERGE |
| DXDEP               | 2 | 0 | 0 | 2 | ADNIMERGE |
| PREHEART            | 2 | 0 | 0 | 2 | ADNIMERGE |
| VSPULSE             | 2 | 0 | 0 | 2 | ADNIMERGE |
| POSTHEART           | 2 | 0 | 0 | 2 | ADNIMERGE |
| BICSFAMT            | 2 | 0 | 0 | 2 | ADNIMERGE |
| AVERR6              | 2 | 0 | 0 | 2 | ADNIMERGE |
| ST62TS              | 2 | 0 | 0 | 2 | ADNIMERGE |
| BNTCSTIM            | 2 | 0 | 0 | 2 | ADNIMERGE |
| T4.OH.PRO           | 2 | 0 | 0 | 2 | ADNIMERGE |
| NPIL                | 2 | 0 | 0 | 2 | ADNIMERGE |
| CA.CDCA             | 2 | 0 | 0 | 2 | ADNIMERGE |
| NPIE                | 2 | 0 | 0 | 2 | ADNIMERGE |
| KMNDBCBSI           | 2 | 0 | 0 | 2 | ADNIMERGE |
| HMHYPERT            | 2 | 0 | 0 | 2 | ADNIMERGE |
| GDAFRAID            | 1 | 0 | 0 | 1 | ADNIMERGE |
| GDBORED             | 1 | 0 | 0 | 1 | ADNIMERGE |

|               |   |   |   |   |           |
|---------------|---|---|---|---|-----------|
| GDDROP        | 1 | 0 | 0 | 1 | ADNIMERGE |
| GDSATIS       | 1 | 0 | 0 | 1 | ADNIMERGE |
| GDHOME        | 1 | 0 | 0 | 1 | ADNIMERGE |
| AVDELERR1     | 1 | 0 | 0 | 1 | ADNIMERGE |
| AVERR2        | 1 | 0 | 0 | 1 | ADNIMERGE |
| ST60TS        | 1 | 0 | 0 | 1 | ADNIMERGE |
| IMAGEUID_LONI | 1 | 0 | 0 | 1 | ADNIMERGE |
| STUDYID_LONI  | 1 | 0 | 0 | 1 | ADNIMERGE |
| LETTERS       | 1 | 0 | 0 | 1 | ADNIMERGE |
| WELL.POSITION | 1 | 0 | 0 | 1 | ADNIMERGE |
| WELL_POSITION | 1 | 0 | 0 | 1 | ADNIMERGE |
| C0            | 1 | 0 | 0 | 1 | ADNIMERGE |
| NPIJ          | 1 | 0 | 0 | 1 | ADNIMERGE |
| NPIK          | 1 | 0 | 0 | 1 | ADNIMERGE |
| PMBLGLUC      | 1 | 0 | 0 | 1 | ADNIMERGE |
| MEASURE_2     | 1 | 0 | 0 | 1 | ADNIMERGE |
| POSTRESP      | 1 | 0 | 0 | 1 | ADNIMERGE |
| PRERESP       | 1 | 0 | 0 | 1 | ADNIMERGE |
| GDSPIRIT      | 1 | 0 | 0 | 1 | ADNIMERGE |
| MH4CARD       | 1 | 0 | 0 | 1 | ADNIMERGE |
| BCANKLE       | 1 | 0 | 0 | 1 | ADNIMERGE |
| PXEDEMA       | 1 | 0 | 0 | 1 | ADNIMERGE |
| MML           | 1 | 0 | 0 | 1 | ADNIMERGE |
| MMW           | 1 | 0 | 0 | 1 | ADNIMERGE |
| MHPSYCH       | 1 | 0 | 0 | 1 | ADNIMERGE |
| BCMUSCLE      | 1 | 0 | 0 | 1 | ADNIMERGE |
| MH8MUSCL      | 1 | 0 | 0 | 1 | ADNIMERGE |
| BCDRYMTH      | 1 | 0 | 0 | 1 | ADNIMERGE |

Table S2 – Significant Comparison Frequencies For Features By Maximum Alpha (ADNIMERGE Features Only)

| Feature                         | ADNIMERGE Frequency | Gene Expression Frequency | MRI Frequency | Total Frequency | Domain    |
|---------------------------------|---------------------|---------------------------|---------------|-----------------|-----------|
| L.LDL.L                         | 23                  | 0                         | 0             | 23              | ADNIMERGE |
| LDL.C                           | 22                  | 0                         | 0             | 22              | ADNIMERGE |
| L.LDL.P                         | 21                  | 0                         | 0             | 21              | ADNIMERGE |
| L.LDL.PL                        | 21                  | 0                         | 0             | 21              | ADNIMERGE |
| L.LDL.C                         | 21                  | 0                         | 0             | 21              | ADNIMERGE |
| L.LDL.FC                        | 21                  | 0                         | 0             | 21              | ADNIMERGE |
| S.LDL.P                         | 21                  | 0                         | 0             | 21              | ADNIMERGE |
| CTX_RH_PARSOPERCULARIS_SUV      | 21                  | 0                         | 0             | 21              | ADNIMERGE |
| M.VLDL.L                        | 20                  | 0                         | 0             | 20              | ADNIMERGE |
| L.LDL.CE                        | 20                  | 0                         | 0             | 20              | ADNIMERGE |
| M.LDL.P                         | 20                  | 0                         | 0             | 20              | ADNIMERGE |
| S.LDL.L                         | 20                  | 0                         | 0             | 20              | ADNIMERGE |
| CTX_LH_SUPERIORFRONTAL_SUV      | 20                  | 0                         | 0             | 20              | ADNIMERGE |
| CTX_RH_SUPERIORFRONTAL_SUV      | 20                  | 0                         | 0             | 20              | ADNIMERGE |
| CTX_RH_SUPRAMARGINAL_SUV        | 20                  | 0                         | 0             | 20              | ADNIMERGE |
| M.VLDL.FC                       | 19                  | 0                         | 0             | 19              | ADNIMERGE |
| IDL.PL                          | 19                  | 0                         | 0             | 19              | ADNIMERGE |
| L.VLDL.P                        | 18                  | 0                         | 0             | 18              | ADNIMERGE |
| M.VLDL.P                        | 18                  | 0                         | 0             | 18              | ADNIMERGE |
| VLDL.TG                         | 18                  | 0                         | 0             | 18              | ADNIMERGE |
| IDL.P                           | 18                  | 0                         | 0             | 18              | ADNIMERGE |
| M.LDL.L                         | 18                  | 0                         | 0             | 18              | ADNIMERGE |
| IDL.L                           | 18                  | 0                         | 0             | 18              | ADNIMERGE |
| CTX_LH_SUPRAMARGINAL_SUV        | 18                  | 0                         | 0             | 18              | ADNIMERGE |
| CTX_LH_POSTERIORCINGULATE_SUV   | 18                  | 0                         | 0             | 18              | ADNIMERGE |
| CTX_LH_CAUDALMIDDLEFRONTAL_SUV  | 18                  | 0                         | 0             | 18              | ADNIMERGE |
| CTX_LH_PARSOPERCULARIS_SUV      | 18                  | 0                         | 0             | 18              | ADNIMERGE |
| L.VLDL.PL                       | 17                  | 0                         | 0             | 17              | ADNIMERGE |
| L.VLDL.TG                       | 17                  | 0                         | 0             | 17              | ADNIMERGE |
| M.VLDL.PL                       | 17                  | 0                         | 0             | 17              | ADNIMERGE |
| S.LDL.C                         | 17                  | 0                         | 0             | 17              | ADNIMERGE |
| CTX_RH_POSTERIORCINGULATE_SUV   | 17                  | 0                         | 0             | 17              | ADNIMERGE |
| CTX_RH_CAUDALMIDDLEFRONTAL_SUV  | 17                  | 0                         | 0             | 17              | ADNIMERGE |
| CTX_RH_ROSTRALMIDDLEFRONTAL_SUV | 17                  | 0                         | 0             | 17              | ADNIMERGE |
| XL.VLDL.L                       | 16                  | 0                         | 0             | 16              | ADNIMERGE |
| L.VLDL.L                        | 16                  | 0                         | 0             | 16              | ADNIMERGE |
| L.VLDL.FC                       | 16                  | 0                         | 0             | 16              | ADNIMERGE |

|                                      |    |   |   |    |           |
|--------------------------------------|----|---|---|----|-----------|
| SERUM.TG                             | 16 | 0 | 0 | 16 | ADNIMERGE |
| M.LDL.C                              | 16 | 0 | 0 | 16 | ADNIMERGE |
| CTX_LH_ROSTRALANTERIORCINGULATE_SUVR | 16 | 0 | 0 | 16 | ADNIMERGE |
| CTX_RH_PARSTRIANGULARIS_SUVR         | 16 | 0 | 0 | 16 | ADNIMERGE |
| CTX_RH_PRECUNEUS_SUVR                | 16 | 0 | 0 | 16 | ADNIMERGE |
| XL.VLDL.P                            | 15 | 0 | 0 | 15 | ADNIMERGE |
| L.VLDL.C                             | 15 | 0 | 0 | 15 | ADNIMERGE |
| S.VLDL.TG                            | 15 | 0 | 0 | 15 | ADNIMERGE |
| IDL.C                                | 15 | 0 | 0 | 15 | ADNIMERGE |
| IDL.CE                               | 15 | 0 | 0 | 15 | ADNIMERGE |
| M.LDL.CE                             | 14 | 0 | 0 | 14 | ADNIMERGE |
| S.LDL.CE                             | 14 | 0 | 0 | 14 | ADNIMERGE |
| CTX_RH_ROSTRALANTERIORCINGULATE_SUVR | 14 | 0 | 0 | 14 | ADNIMERGE |
| CTX_LH_PARSTRIANGULARIS_SUVR         | 14 | 0 | 0 | 14 | ADNIMERGE |
| XL.VLDL.C                            | 13 | 0 | 0 | 13 | ADNIMERGE |
| M.LDL.FC                             | 13 | 0 | 0 | 13 | ADNIMERGE |
| CTX_LH_PRECUNEUS_SUVR                | 13 | 0 | 0 | 13 | ADNIMERGE |
| CTX_RH_LATERALORBITOFRONTAL_SUVR     | 13 | 0 | 0 | 13 | ADNIMERGE |
| M.VLDL.C                             | 12 | 0 | 0 | 12 | ADNIMERGE |
| CTX_LH_ROSTRALMIDDLEFRONTAL_SUVR     | 12 | 0 | 0 | 12 | ADNIMERGE |
| L.VLDL.CE                            | 11 | 0 | 0 | 11 | ADNIMERGE |
| M.LDL.PL                             | 11 | 0 | 0 | 11 | ADNIMERGE |
| XL.VLDL.PL                           | 10 | 0 | 0 | 10 | ADNIMERGE |
| S.VLDL.P                             | 10 | 0 | 0 | 10 | ADNIMERGE |
| CTX_LH_LATERALORBITOFRONTAL_SUVR     | 10 | 0 | 0 | 10 | ADNIMERGE |
| XL.VLDL.CE                           | 9  | 0 | 0 | 9  | ADNIMERGE |
| S.VLDL.L                             | 9  | 0 | 0 | 9  | ADNIMERGE |
| IDL.FC                               | 9  | 0 | 0 | 9  | ADNIMERGE |
| FREEC                                | 9  | 0 | 0 | 9  | ADNIMERGE |
| CTX_RH_MEDIALORBITOFRONTAL_SUVR      | 9  | 0 | 0 | 9  | ADNIMERGE |
| XXL.VLDL.C                           | 8  | 0 | 0 | 8  | ADNIMERGE |
| M.VLDL.TG                            | 8  | 0 | 0 | 8  | ADNIMERGE |
| S.LDL.FC                             | 8  | 0 | 0 | 8  | ADNIMERGE |
| HDL.D                                | 8  | 0 | 0 | 8  | ADNIMERGE |
| L.HDL.L                              | 8  | 0 | 0 | 8  | ADNIMERGE |
| L.HDL.P                              | 8  | 0 | 0 | 8  | ADNIMERGE |
| CTX_RH_BANKSSTS_SUVR                 | 8  | 0 | 0 | 8  | ADNIMERGE |
| CTX_RH_CAUDALANTERIORCINGULATE_SUVR  | 8  | 0 | 0 | 8  | ADNIMERGE |
| CTX_RH_INFERIORPARIETAL_SUVR         | 8  | 0 | 0 | 8  | ADNIMERGE |
| CTX_RH_SUPERIORPARIETAL_SUVR         | 8  | 0 | 0 | 8  | ADNIMERGE |
| CTX_RH_POSTCENTRAL_SUVR              | 8  | 0 | 0 | 8  | ADNIMERGE |

|                                     |   |   |   |   |           |
|-------------------------------------|---|---|---|---|-----------|
| EXAMDATE.BL                         | 7 | 0 | 0 | 7 | ADNIMERGE |
| LONISID                             | 7 | 0 | 0 | 7 | ADNIMERGE |
| XXL.VLDL.FC                         | 7 | 0 | 0 | 7 | ADNIMERGE |
| TG.PG                               | 7 | 0 | 0 | 7 | ADNIMERGE |
| CTX_RH_PRECENTRAL_SUVR              | 7 | 0 | 0 | 7 | ADNIMERGE |
| CTX_RH_ISTHMUSCINGULATE_SUVR        | 7 | 0 | 0 | 7 | ADNIMERGE |
| PTNO                                | 6 | 0 | 0 | 6 | ADNIMERGE |
| XXL.VLDL.L                          | 6 | 0 | 0 | 6 | ADNIMERGE |
| XXL.VLDL.P                          | 6 | 0 | 0 | 6 | ADNIMERGE |
| XXL.VLDL.PL                         | 6 | 0 | 0 | 6 | ADNIMERGE |
| SERUM.C                             | 6 | 0 | 0 | 6 | ADNIMERGE |
| XL.HDL.L                            | 6 | 0 | 0 | 6 | ADNIMERGE |
| XL.HDL.P                            | 6 | 0 | 0 | 6 | ADNIMERGE |
| L.HDL.C                             | 6 | 0 | 0 | 6 | ADNIMERGE |
| L.HDL.CE                            | 6 | 0 | 0 | 6 | ADNIMERGE |
| CTX_LH_CAUDALANTERIORCINGULATE_SUVR | 6 | 0 | 0 | 6 | ADNIMERGE |
| CTX_LH_PRECENTRAL_SUVR              | 6 | 0 | 0 | 6 | ADNIMERGE |
| CTX_RH_INSULA_SUVR                  | 6 | 0 | 0 | 6 | ADNIMERGE |
| CTX_LH_ISTHMUSCINGULATE_SUVR        | 6 | 0 | 0 | 6 | ADNIMERGE |
| CTX_LH_PARACENTRAL_SUVR             | 6 | 0 | 0 | 6 | ADNIMERGE |
| CTX_RH_PARACENTRAL_SUVR             | 6 | 0 | 0 | 6 | ADNIMERGE |
| CTX_RH_SUPERIORETEMPORAL_SUVR       | 6 | 0 | 0 | 6 | ADNIMERGE |
| SAMPLE.BAR.CODE                     | 5 | 0 | 0 | 5 | ADNIMERGE |
| SAMPLE.IDENTIFICATION               | 5 | 0 | 0 | 5 | ADNIMERGE |
| IMAGEUID_1                          | 5 | 0 | 0 | 5 | ADNIMERGE |
| ADAS11                              | 5 | 0 | 0 | 5 | ADNIMERGE |
| TOTSCORE                            | 5 | 0 | 0 | 5 | ADNIMERGE |
| TOTALI3                             | 5 | 0 | 0 | 5 | ADNIMERGE |
| ADAS13                              | 5 | 0 | 0 | 5 | ADNIMERGE |
| ADAS11.BL                           | 5 | 0 | 0 | 5 | ADNIMERGE |
| ADAS13.BL                           | 5 | 0 | 0 | 5 | ADNIMERGE |
| BILAVCENT                           | 5 | 0 | 0 | 5 | ADNIMERGE |
| BIREDCENT                           | 5 | 0 | 0 | 5 | ADNIMERGE |
| BILAVFROZ                           | 5 | 0 | 0 | 5 | ADNIMERGE |
| BILAVTRNS                           | 5 | 0 | 0 | 5 | ADNIMERGE |
| BIREFROZ                            | 5 | 0 | 0 | 5 | ADNIMERGE |
| BIREDTRNS                           | 5 | 0 | 0 | 5 | ADNIMERGE |
| XXL.VLDL.TG                         | 5 | 0 | 0 | 5 | ADNIMERGE |
| XL.VLDL.FC                          | 5 | 0 | 0 | 5 | ADNIMERGE |
| XL.VLDL.TG                          | 5 | 0 | 0 | 5 | ADNIMERGE |
| ESTC                                | 5 | 0 | 0 | 5 | ADNIMERGE |

|                                 |   |   |   |   |           |
|---------------------------------|---|---|---|---|-----------|
| XL.HDL.FC                       | 5 | 0 | 0 | 5 | ADNIMERGE |
| L.HDL.FC                        | 5 | 0 | 0 | 5 | ADNIMERGE |
| M.HDL.L                         | 5 | 0 | 0 | 5 | ADNIMERGE |
| M.HDL.P                         | 5 | 0 | 0 | 5 | ADNIMERGE |
| M.HDL.C                         | 5 | 0 | 0 | 5 | ADNIMERGE |
| M.HDL.FC                        | 5 | 0 | 0 | 5 | ADNIMERGE |
| CC_MID_ANTERIOR_SUVR            | 5 | 0 | 0 | 5 | ADNIMERGE |
| CC_POSTERIOR_SUVR               | 5 | 0 | 0 | 5 | ADNIMERGE |
| CTX_LH_SUPERIORPARIETAL_SUVR    | 5 | 0 | 0 | 5 | ADNIMERGE |
| CTX_RH_MIDDLETEMPORAL_SUVR      | 5 | 0 | 0 | 5 | ADNIMERGE |
| CTX_LH_MEDIALORBITOFRONTAL_SUVR | 5 | 0 | 0 | 5 | ADNIMERGE |
| CTX_LH_POSTCENTRAL_SUVR         | 5 | 0 | 0 | 5 | ADNIMERGE |
| FRONTAL_SUVR                    | 5 | 0 | 0 | 5 | ADNIMERGE |
| COMPOSITE_SUVR                  | 5 | 0 | 0 | 5 | ADNIMERGE |
| SAMPLE_BAR_CODE                 | 4 | 0 | 0 | 4 | ADNIMERGE |
| VENTVOL                         | 4 | 0 | 0 | 4 | ADNIMERGE |
| VENTRICLES                      | 4 | 0 | 0 | 4 | ADNIMERGE |
| VENTRICLES.BL                   | 4 | 0 | 0 | 4 | ADNIMERGE |
| S.LDL.PL                        | 4 | 0 | 0 | 4 | ADNIMERGE |
| XL.HDL.PL                       | 4 | 0 | 0 | 4 | ADNIMERGE |
| XL.HDL.C                        | 4 | 0 | 0 | 4 | ADNIMERGE |
| XL.HDL.CE                       | 4 | 0 | 0 | 4 | ADNIMERGE |
| L.HDL.PL                        | 4 | 0 | 0 | 4 | ADNIMERGE |
| M.HDL.PL                        | 4 | 0 | 0 | 4 | ADNIMERGE |
| M.HDL.CE                        | 4 | 0 | 0 | 4 | ADNIMERGE |
| CC_ANTERIOR_SUVR                | 4 | 0 | 0 | 4 | ADNIMERGE |
| CC_CENTRAL_SUVR                 | 4 | 0 | 0 | 4 | ADNIMERGE |
| CTX_LH_INFERIORETEMPORAL_SUVR   | 4 | 0 | 0 | 4 | ADNIMERGE |
| CTX_LH_INFERIORPARIETAL_SUVR    | 4 | 0 | 0 | 4 | ADNIMERGE |
| CTX_RH_INFERIORETEMPORAL_SUVR   | 4 | 0 | 0 | 4 | ADNIMERGE |
| CTX_RH_PARSORBITALIS_SUVR       | 4 | 0 | 0 | 4 | ADNIMERGE |
| BRAIN_STEM_SUVR                 | 4 | 0 | 0 | 4 | ADNIMERGE |
| CINGULATE_SUVR                  | 4 | 0 | 0 | 4 | ADNIMERGE |
| PARIETAL_SUVR                   | 4 | 0 | 0 | 4 | ADNIMERGE |
| TEMPORAL_SUVR                   | 4 | 0 | 0 | 4 | ADNIMERGE |
| SUMMARYSUVR_WHOLECEREBNORM      | 4 | 0 | 0 | 4 | ADNIMERGE |
| IMAGEUID_2                      | 3 | 0 | 0 | 3 | ADNIMERGE |
| MPACCDIGIT                      | 3 | 0 | 0 | 3 | ADNIMERGE |
| MPACCTRAILSB                    | 3 | 0 | 0 | 3 | ADNIMERGE |
| MPACCDIGIT.BL                   | 3 | 0 | 0 | 3 | ADNIMERGE |
| MPACCTRAILSB.BL                 | 3 | 0 | 0 | 3 | ADNIMERGE |

|                             |   |   |   |   |           |
|-----------------------------|---|---|---|---|-----------|
| RAVLT.IMMEDIATE             | 3 | 0 | 0 | 3 | ADNIMERGE |
| RAVLT.IMMEDIATE.BL          | 3 | 0 | 0 | 3 | ADNIMERGE |
| HIPPOCAMPUS                 | 3 | 0 | 0 | 3 | ADNIMERGE |
| HIPPOCAMPUS.BL              | 3 | 0 | 0 | 3 | ADNIMERGE |
| ST37SV                      | 3 | 0 | 0 | 3 | ADNIMERGE |
| ST96SV                      | 3 | 0 | 0 | 3 | ADNIMERGE |
| REMNAANT.C                  | 3 | 0 | 0 | 3 | ADNIMERGE |
| VLDL.D                      | 3 | 0 | 0 | 3 | ADNIMERGE |
| VLDL.C                      | 3 | 0 | 0 | 3 | ADNIMERGE |
| S.VLDL.FC                   | 3 | 0 | 0 | 3 | ADNIMERGE |
| XS.VLDL.L                   | 3 | 0 | 0 | 3 | ADNIMERGE |
| LDL.TG                      | 3 | 0 | 0 | 3 | ADNIMERGE |
| HDL.C                       | 3 | 0 | 0 | 3 | ADNIMERGE |
| HDL2.C                      | 3 | 0 | 0 | 3 | ADNIMERGE |
| WM_HYPOINTENSITIES_SUVR     | 3 | 0 | 0 | 3 | ADNIMERGE |
| CC_MID_POSTERIOR_SUVR       | 3 | 0 | 0 | 3 | ADNIMERGE |
| CTX_LH_MIDDLETEMPORAL_SUVR  | 3 | 0 | 0 | 3 | ADNIMERGE |
| CTX_LH_INSULA_SUVR          | 3 | 0 | 0 | 3 | ADNIMERGE |
| CEREBELLUMGREYMATTER_VOLUME | 3 | 0 | 0 | 3 | ADNIMERGE |
| MMSCORE                     | 2 | 0 | 0 | 2 | ADNIMERGE |
| MMSE                        | 2 | 0 | 0 | 2 | ADNIMERGE |
| MMSE.BL                     | 2 | 0 | 0 | 2 | ADNIMERGE |
| AVTOT3                      | 2 | 0 | 0 | 2 | ADNIMERGE |
| AVTOT4                      | 2 | 0 | 0 | 2 | ADNIMERGE |
| AVDEL30MIN                  | 2 | 0 | 0 | 2 | ADNIMERGE |
| RAVLT.PERC.FORGETTING       | 2 | 0 | 0 | 2 | ADNIMERGE |
| RAVLT.PERC.FORGETTING.BL    | 2 | 0 | 0 | 2 | ADNIMERGE |
| ADASQ4                      | 2 | 0 | 0 | 2 | ADNIMERGE |
| Q4SCORE                     | 2 | 0 | 0 | 2 | ADNIMERGE |
| ADASQ4.BL                   | 2 | 0 | 0 | 2 | ADNIMERGE |
| FAQ                         | 2 | 0 | 0 | 2 | ADNIMERGE |
| FAQTOTAL                    | 2 | 0 | 0 | 2 | ADNIMERGE |
| FAQ.BL                      | 2 | 0 | 0 | 2 | ADNIMERGE |
| BILAVTIME                   | 2 | 0 | 0 | 2 | ADNIMERGE |
| BIREDTIME                   | 2 | 0 | 0 | 2 | ADNIMERGE |
| CLTIME                      | 2 | 0 | 0 | 2 | ADNIMERGE |
| IMAGEUID                    | 2 | 0 | 0 | 2 | ADNIMERGE |
| IMAGEUID.BL                 | 2 | 0 | 0 | 2 | ADNIMERGE |
| ICV                         | 2 | 0 | 0 | 2 | ADNIMERGE |
| ST10CV                      | 2 | 0 | 0 | 2 | ADNIMERGE |
| ICV.BL                      | 2 | 0 | 0 | 2 | ADNIMERGE |

|                                    |   |   |   |   |           |
|------------------------------------|---|---|---|---|-----------|
| ST29SV                             | 2 | 0 | 0 | 2 | ADNIMERGE |
| ST88SV                             | 2 | 0 | 0 | 2 | ADNIMERGE |
| ESTIMATE                           | 2 | 0 | 0 | 2 | ADNIMERGE |
| LWR                                | 2 | 0 | 0 | 2 | ADNIMERGE |
| UPR                                | 2 | 0 | 0 | 2 | ADNIMERGE |
| BRAINVOL                           | 2 | 0 | 0 | 2 | ADNIMERGE |
| WHOLEBRAIN                         | 2 | 0 | 0 | 2 | ADNIMERGE |
| WHOLEBRAIN.BL                      | 2 | 0 | 0 | 2 | ADNIMERGE |
| BNTPHON                            | 2 | 0 | 0 | 2 | ADNIMERGE |
| BNTSPONT                           | 2 | 0 | 0 | 2 | ADNIMERGE |
| BNTTOTAL                           | 2 | 0 | 0 | 2 | ADNIMERGE |
| XXL.VLDL.CE                        | 2 | 0 | 0 | 2 | ADNIMERGE |
| M.VLDL.CE                          | 2 | 0 | 0 | 2 | ADNIMERGE |
| S.VLDL.C                           | 2 | 0 | 0 | 2 | ADNIMERGE |
| XS.VLDL.P                          | 2 | 0 | 0 | 2 | ADNIMERGE |
| XS.VLDL.PL                         | 2 | 0 | 0 | 2 | ADNIMERGE |
| L.LDL.TG                           | 2 | 0 | 0 | 2 | ADNIMERGE |
| M.LDL.TG                           | 2 | 0 | 0 | 2 | ADNIMERGE |
| PC                                 | 2 | 0 | 0 | 2 | ADNIMERGE |
| TOTPG                              | 2 | 0 | 0 | 2 | ADNIMERGE |
| TOTCHO                             | 2 | 0 | 0 | 2 | ADNIMERGE |
| PUFA                               | 2 | 0 | 0 | 2 | ADNIMERGE |
| TOTFA                              | 2 | 0 | 0 | 2 | ADNIMERGE |
| FAW6                               | 2 | 0 | 0 | 2 | ADNIMERGE |
| MEAN                               | 2 | 0 | 0 | 2 | ADNIMERGE |
| MEDIAN                             | 2 | 0 | 0 | 2 | ADNIMERGE |
| MAX                                | 2 | 0 | 0 | 2 | ADNIMERGE |
| ERODED_SUBCORTICALWM_SUVR          | 2 | 0 | 0 | 2 | ADNIMERGE |
| LEFT_CEREBRAL_WHITE_MATTER_SUVR    | 2 | 0 | 0 | 2 | ADNIMERGE |
| RIGHT_CEREBRAL_WHITE_MATTER_SUVR   | 2 | 0 | 0 | 2 | ADNIMERGE |
| CTX_LH_BANKSSTS_SUVR               | 2 | 0 | 0 | 2 | ADNIMERGE |
| CTX_LH_FUSIFORM_SUVR               | 2 | 0 | 0 | 2 | ADNIMERGE |
| CTX_RH_FUSIFORM_SUVR               | 2 | 0 | 0 | 2 | ADNIMERGE |
| CTX_LH_SUPERIORTEMPORAL_SUVR       | 2 | 0 | 0 | 2 | ADNIMERGE |
| LEFT_CEREBELLUM_CORTEX_VOLUME      | 2 | 0 | 0 | 2 | ADNIMERGE |
| RIGHT_CEREBELLUM_CORTEX_VOLUME     | 2 | 0 | 0 | 2 | ADNIMERGE |
| LEFT_CEREBELLUM_WHITE_MATTER_SUVR  | 2 | 0 | 0 | 2 | ADNIMERGE |
| RIGHT_CEREBELLUM_WHITE_MATTER_SUVR | 2 | 0 | 0 | 2 | ADNIMERGE |
| LEFT_VENTRALDC_SUVR                | 2 | 0 | 0 | 2 | ADNIMERGE |
| RIGHT_VENTRALDC_SUVR               | 2 | 0 | 0 | 2 | ADNIMERGE |
| AGE                                | 1 | 0 | 0 | 1 | ADNIMERGE |



|                      |   |   |   |   |           |
|----------------------|---|---|---|---|-----------|
| PTDOB                | 1 | 0 | 0 | 1 | ADNIMERGE |
| LDELTOTAL            | 1 | 0 | 0 | 1 | ADNIMERGE |
| LDELTOTAL.BL         | 1 | 0 | 0 | 1 | ADNIMERGE |
| CDRSB                | 1 | 0 | 0 | 1 | ADNIMERGE |
| CDRSB.BL             | 1 | 0 | 0 | 1 | ADNIMERGE |
| LDELBEGIN            | 1 | 0 | 0 | 1 | ADNIMERGE |
| LIMMEND              | 1 | 0 | 0 | 1 | ADNIMERGE |
| CSF                  | 1 | 0 | 0 | 1 | ADNIMERGE |
| CSFVOL               | 1 | 0 | 0 | 1 | ADNIMERGE |
| RAVLT.LEARNING       | 1 | 0 | 0 | 1 | ADNIMERGE |
| RAVLT.LEARNING.BL    | 1 | 0 | 0 | 1 | ADNIMERGE |
| RAVLT.FORGETTING     | 1 | 0 | 0 | 1 | ADNIMERGE |
| RAVLT.FORGETTING.BL  | 1 | 0 | 0 | 1 | ADNIMERGE |
| TRABSCOR             | 1 | 0 | 0 | 1 | ADNIMERGE |
| TRABSCOR.BL          | 1 | 0 | 0 | 1 | ADNIMERGE |
| ST127SV              | 1 | 0 | 0 | 1 | ADNIMERGE |
| VENTRICLE_3RD_VOLUME | 1 | 0 | 0 | 1 | ADNIMERGE |
| ST17SV               | 1 | 0 | 0 | 1 | ADNIMERGE |
| ST76SV               | 1 | 0 | 0 | 1 | ADNIMERGE |
| ST18SV               | 1 | 0 | 0 | 1 | ADNIMERGE |
| ST77SV               | 1 | 0 | 0 | 1 | ADNIMERGE |
| BRAIN_STEM_VOLUME    | 1 | 0 | 0 | 1 | ADNIMERGE |
| ST1SV                | 1 | 0 | 0 | 1 | ADNIMERGE |
| ST9SV                | 1 | 0 | 0 | 1 | ADNIMERGE |
| VENTRICLE_4TH_VOLUME | 1 | 0 | 0 | 1 | ADNIMERGE |
| PLA                  | 1 | 0 | 0 | 1 | ADNIMERGE |
| PLAVOL               | 1 | 0 | 0 | 1 | ADNIMERGE |
| URN                  | 1 | 0 | 0 | 1 | ADNIMERGE |
| URNVOL               | 1 | 0 | 0 | 1 | ADNIMERGE |
| LONI_IMAGE           | 1 | 0 | 0 | 1 | ADNIMERGE |
| LONI_STUDY           | 1 | 0 | 0 | 1 | ADNIMERGE |
| IMAGEUID_LONI        | 1 | 0 | 0 | 1 | ADNIMERGE |
| STUDYID_LONI         | 1 | 0 | 0 | 1 | ADNIMERGE |
| ECOGSPMEM            | 1 | 0 | 0 | 1 | ADNIMERGE |
| ECOGSPTOTAL          | 1 | 0 | 0 | 1 | ADNIMERGE |
| WELL.POSITION        | 1 | 0 | 0 | 1 | ADNIMERGE |
| WELL_POSITION        | 1 | 0 | 0 | 1 | ADNIMERGE |
| PC.AE.C34.2          | 1 | 0 | 0 | 1 | ADNIMERGE |
| PC.AE.C36.3          | 1 | 0 | 0 | 1 | ADNIMERGE |
| PC.AE.C36.4          | 1 | 0 | 0 | 1 | ADNIMERGE |
| PC.AE.C38.5          | 1 | 0 | 0 | 1 | ADNIMERGE |

|                                      |   |   |   |   |           |
|--------------------------------------|---|---|---|---|-----------|
| C13.PE.16.0.22.6                     | 1 | 0 | 0 | 1 | ADNIMERGE |
| C13.PE.P.16.0.22.6                   | 1 | 0 | 0 | 1 | ADNIMERGE |
| APOB                                 | 1 | 0 | 0 | 1 | ADNIMERGE |
| GDCA.CA                              | 1 | 0 | 0 | 1 | ADNIMERGE |
| TDCA.CA                              | 1 | 0 | 0 | 1 | ADNIMERGE |
| S.VLDL.PL                            | 1 | 0 | 0 | 1 | ADNIMERGE |
| S.VLDL.CE                            | 1 | 0 | 0 | 1 | ADNIMERGE |
| XS.VLDL.C                            | 1 | 0 | 0 | 1 | ADNIMERGE |
| XS.VLDL.CE                           | 1 | 0 | 0 | 1 | ADNIMERGE |
| XS.VLDL.TG                           | 1 | 0 | 0 | 1 | ADNIMERGE |
| IDL.TG                               | 1 | 0 | 0 | 1 | ADNIMERGE |
| S.HDL.L                              | 1 | 0 | 0 | 1 | ADNIMERGE |
| S.HDL.P                              | 1 | 0 | 0 | 1 | ADNIMERGE |
| S.HDL.C                              | 1 | 0 | 0 | 1 | ADNIMERGE |
| S.HDL.CE                             | 1 | 0 | 0 | 1 | ADNIMERGE |
| SFA                                  | 1 | 0 | 0 | 1 | ADNIMERGE |
| DHA                                  | 1 | 0 | 0 | 1 | ADNIMERGE |
| FAW3                                 | 1 | 0 | 0 | 1 | ADNIMERGE |
| LA                                   | 1 | 0 | 0 | 1 | ADNIMERGE |
| ENTORHINAL                           | 1 | 0 | 0 | 1 | ADNIMERGE |
| ENTORHINAL.BL                        | 1 | 0 | 0 | 1 | ADNIMERGE |
| FUSIFORM                             | 1 | 0 | 0 | 1 | ADNIMERGE |
| FUSIFORM.BL                          | 1 | 0 | 0 | 1 | ADNIMERGE |
| MIDTEMP                              | 1 | 0 | 0 | 1 | ADNIMERGE |
| MIDTEMP.BL                           | 1 | 0 | 0 | 1 | ADNIMERGE |
| MIN                                  | 1 | 0 | 0 | 1 | ADNIMERGE |
| MODE                                 | 1 | 0 | 0 | 1 | ADNIMERGE |
| CTX_LH_CUNEUS_SUVR                   | 1 | 0 | 0 | 1 | ADNIMERGE |
| CTX_RH_CUNEUS_SUVR                   | 1 | 0 | 0 | 1 | ADNIMERGE |
| CTX_LH_PARSORBITALIS_SUVR            | 1 | 0 | 0 | 1 | ADNIMERGE |
| CTX_LH_PERICALCARINE_SUVR            | 1 | 0 | 0 | 1 | ADNIMERGE |
| CTX_RH_PERICALCARINE_SUVR            | 1 | 0 | 0 | 1 | ADNIMERGE |
| CTX_LH_TRANSVERSETEMPORAL_SUVR       | 1 | 0 | 0 | 1 | ADNIMERGE |
| CTX_RH_TRANSVERSETEMPORAL_SUVR       | 1 | 0 | 0 | 1 | ADNIMERGE |
| CTX_LH_FRONTALPOLE_SUVR              | 1 | 0 | 0 | 1 | ADNIMERGE |
| CTX_RH_FRONTALPOLE_SUVR              | 1 | 0 | 0 | 1 | ADNIMERGE |
| LEFT_ACCUMBENS_AREA_SUVR             | 1 | 0 | 0 | 1 | ADNIMERGE |
| RIGHT_ACCUMBENS_AREA_SUVR            | 1 | 0 | 0 | 1 | ADNIMERGE |
| LEFT_CEREBELLUM_WHITE_MATTER_VOLUME  | 1 | 0 | 0 | 1 | ADNIMERGE |
| RIGHT_CEREBELLUM_WHITE_MATTER_VOLUME | 1 | 0 | 0 | 1 | ADNIMERGE |
| LEFT_CEREBRAL_WHITE_MATTER_VOLUME    | 1 | 0 | 0 | 1 | ADNIMERGE |

|                                    |   |   |   |   |           |
|------------------------------------|---|---|---|---|-----------|
| RIGHT_CEREBRAL_WHITE_MATTER_VOLUME | 1 | 0 | 0 | 1 | ADNIMERGE |
| LEFT_HIPPOCAMPUS_SUVR              | 1 | 0 | 0 | 1 | ADNIMERGE |
| RIGHT_HIPPOCAMPUS_SUVR             | 1 | 0 | 0 | 1 | ADNIMERGE |
| LEFT_LATERAL_VENTRICLE_SUVR        | 1 | 0 | 0 | 1 | ADNIMERGE |
| RIGHT_LATERAL_VENTRICLE_SUVR       | 1 | 0 | 0 | 1 | ADNIMERGE |
| LEFT_PUTAMEN_SUVR                  | 1 | 0 | 0 | 1 | ADNIMERGE |
| RIGHT_PUTAMEN_SUVR                 | 1 | 0 | 0 | 1 | ADNIMERGE |
| WHOLECEREBELLUM_VOLUME             | 1 | 0 | 0 | 1 | ADNIMERGE |
| MCSUVRCERE                         | 1 | 0 | 0 | 1 | ADNIMERGE |
| ACI                                | 1 | 0 | 0 | 1 | ADNIMERGE |
| PQDATE                             | 1 | 0 | 0 | 1 | ADNIMERGE |
| PQDATTRA                           | 1 | 0 | 0 | 1 | ADNIMERGE |
| TIMEBEGAN                          | 1 | 0 | 0 | 1 | ADNIMERGE |
| TIMEEND                            | 1 | 0 | 0 | 1 | ADNIMERGE |

Table S3: Comparison Frequencies Of The Subset Analysis (Male Subset)

| Domain          | Average | Standard Deviation | Minimum | Maximum |
|-----------------|---------|--------------------|---------|---------|
| ADNIMERGE       | 1.42    | 0.63               | 1.0     | 4.0     |
| Gene Expression | 0.0     | 0.0                | 0.0     | 0.0     |
| MRI             | 0.0     | 0.0                | 0.0     | 0.0     |

A – ADNIMERGE Frequencies

| Domain          | Average | Standard Deviation | Minimum | Maximum |
|-----------------|---------|--------------------|---------|---------|
| ADNIMERGE       | 0.0     | 0.0                | 0.0     | 0.0     |
| Gene Expression | 0.0     | 0.0                | 0.0     | 0.0     |
| MRI             | 3327.39 | 2214.28            | 1.0     | 4945.0  |

C – MRI Frequencies

*Table S3 – Male Subset*

| Domain          | Average | Standard Deviation | Minimum | Maximum |
|-----------------|---------|--------------------|---------|---------|
| ADNIMERGE       | 0.0     | 0.0                | 0.0     | 0.0     |
| Gene Expression | 1.59    | 1.13               | 1.0     | 6.0     |
| MRI             | 0.0     | 0.0                | 0.0     | 0.0     |

B – Gene Expression Frequencies

| Domain          | Average | Standard Deviation | Minimum | Maximum |
|-----------------|---------|--------------------|---------|---------|
| ADNIMERGE       | 1.42    | 0.63               | 1.0     | 4.0     |
| Gene Expression | 1.59    | 1.13               | 1.0     | 6.0     |
| MRI             | 3327.39 | 2214.28            | 1.0     | 4945.0  |

D – Total Frequencies

Table S4: Comparison Frequencies Of The Subset Analysis (Female Subset)

| Domain          | Average | Standard Deviation | Minimum | Maximum |
|-----------------|---------|--------------------|---------|---------|
| ADNIMERGE       | 1.28    | 0.47               | 1.0     | 3.0     |
| Gene Expression | 0.0     | 0.0                | 0.0     | 0.0     |
| MRI             | 0.0     | 0.0                | 0.0     | 0.0     |

A – ADNIMERGE Frequencies

| Domain          | Average | Standard Deviation | Minimum | Maximum |
|-----------------|---------|--------------------|---------|---------|
| ADNIMERGE       | 0.0     | 0.0                | 0.0     | 0.0     |
| Gene Expression | 0.0     | 0.0                | 0.0     | 0.0     |
| MRI             | 4050.25 | 1929.62            | 1.0     | 5146.0  |

C – MRI Frequencies

*Table S4 – Female Subset*

| Domain          | Average | Standard Deviation | Minimum | Maximum |
|-----------------|---------|--------------------|---------|---------|
| ADNIMERGE       | 0.0     | 0.0                | 0.0     | 0.0     |
| Gene Expression | 1.33    | 0.55               | 1.0     | 3.0     |
| MRI             | 0.0     | 0.0                | 0.0     | 0.0     |

B – Gene Expression Frequencies

| Domain          | Average | Standard Deviation | Minimum | Maximum |
|-----------------|---------|--------------------|---------|---------|
| ADNIMERGE       | 1.28    | 0.47               | 1.0     | 3.0     |
| Gene Expression | 1.33    | 0.55               | 1.0     | 3.0     |
| MRI             | 4050.25 | 1929.62            | 1.0     | 5146.0  |

D – Total Frequencies

Table S5: Comparison Frequencies Of The Subset Analysis (CDR=0 Subset)

| Domain          | Average | Standard Deviation | Minimum | Maximum |
|-----------------|---------|--------------------|---------|---------|
| ADNIMERGE       | 5.48    | 5.83               | 1.0     | 23.0    |
| Gene Expression | 0.0     | 0.0                | 0.0     | 0.0     |
| MRI             | 0.0     | 0.0                | 0.0     | 0.0     |

A – ADNIMERGE Frequencies

| Domain          | Average | Standard Deviation | Minimum | Maximum |
|-----------------|---------|--------------------|---------|---------|
| ADNIMERGE       | 0.0     | 0.0                | 0.0     | 0.0     |
| Gene Expression | 0.0     | 0.0                | 0.0     | 0.0     |
| MRI             | 2457.08 | 4397.99            | 1.0     | 11957.0 |

C – MRI Frequencies

*Table S5 – CDR=0 Control Subset*

| Domain          | Average | Standard Deviation | Minimum | Maximum |
|-----------------|---------|--------------------|---------|---------|
| ADNIMERGE       | 0.0     | 0.0                | 0.0     | 0.0     |
| Gene Expression | 1.55    | 0.94               | 1.0     | 7.0     |
| MRI             | 0.0     | 0.0                | 0.0     | 0.0     |

B – Gene Expression Frequencies

| Domain          | Average | Standard Deviation | Minimum | Maximum |
|-----------------|---------|--------------------|---------|---------|
| ADNIMERGE       | 5.48    | 5.83               | 1.0     | 23.0    |
| Gene Expression | 1.55    | 0.94               | 1.0     | 7.0     |
| MRI             | 2457.08 | 4397.99            | 1.0     | 11957.0 |

D – Total Frequencies

Table S6: Comparison Frequencies Of The Subset Analysis (CDR=0.5 Subset)

| Domain          | Average | Standard Deviation | Minimum | Maximum |
|-----------------|---------|--------------------|---------|---------|
| ADNIMERGE       | 5.48    | 5.83               | 1.0     | 23.0    |
| Gene Expression | 0.0     | 0.0                | 0.0     | 0.0     |
| MRI             | 0.0     | 0.0                | 0.0     | 0.0     |

A – ADNIMERGE Frequencies

| Domain          | Average | Standard Deviation | Minimum | Maximum |
|-----------------|---------|--------------------|---------|---------|
| ADNIMERGE       | 0.0     | 0.0                | 0.0     | 0.0     |
| Gene Expression | 0.0     | 0.0                | 0.0     | 0.0     |
| MRI             | 2457.08 | 4397.99            | 1.0     | 11957.0 |

C – MRI Frequencies

*Table S6 – CDR=0.5 Subset*

| Domain          | Average | Standard Deviation | Minimum | Maximum |
|-----------------|---------|--------------------|---------|---------|
| ADNIMERGE       | 0.0     | 0.0                | 0.0     | 0.0     |
| Gene Expression | 1.55    | 0.94               | 1.0     | 7.0     |
| MRI             | 0.0     | 0.0                | 0.0     | 0.0     |

B – Gene Expression Frequencies

| Domain          | Average | Standard Deviation | Minimum | Maximum |
|-----------------|---------|--------------------|---------|---------|
| ADNIMERGE       | 5.48    | 5.83               | 1.0     | 23.0    |
| Gene Expression | 1.55    | 0.94               | 1.0     | 7.0     |
| MRI             | 2457.08 | 4397.99            | 1.0     | 11957.0 |

D – MRI Frequency

Table S7: Comparison Frequencies Of The Subset Analysis (CDR $\geq$ 1.0 Subset)

| Domain          | Average | Standard Deviation | Minimum | Maximum |
|-----------------|---------|--------------------|---------|---------|
| ADNIMERGE       | 1.67    | 0.47               | 1.0     | 2.0     |
| Gene Expression | 0.0     | 0.0                | 0.0     | 0.0     |
| MRI             | 0.0     | 0.0                | 0.0     | 0.0     |

A – ADNIMERGE Frequencies

| Domain          | Average | Standard Deviation | Minimum | Maximum |
|-----------------|---------|--------------------|---------|---------|
| ADNIMERGE       | 0.0     | 0.0                | 0.0     | 0.0     |
| Gene Expression | 0.0     | 0.0                | 0.0     | 0.0     |
| MRI             | 1.65    | 1.03               | 1.0     | 4.0     |

C – MRI Frequencies

| Domain          | Average | Standard Deviation | Minimum | Maximum |
|-----------------|---------|--------------------|---------|---------|
| ADNIMERGE       | 0.0     | 0.0                | 0.0     | 0.0     |
| Gene Expression | 0.0     | 0.0                | 0.0     | 0.0     |
| MRI             | 0.0     | 0.0                | 0.0     | 0.0     |

B – Gene Expression Frequencies

| Domain          | Average | Standard Deviation | Minimum | Maximum |
|-----------------|---------|--------------------|---------|---------|
| ADNIMERGE       | 1.67    | 0.47               | 1.0     | 2.0     |
| Gene Expression | 0.0     | 0.0                | 0.0     | 0.0     |
| MRI             | 1.65    | 1.03               | 1.0     | 4.0     |

D – Total Frequencies

*Table S7 – CDR $\geq$ 1.0 Subset*

Table S8– Maximally-significant correlations with sufficient data to perform subsetting: Males

| Domain          | Average | Standard Deviation | Minimum | Maximum |
|-----------------|---------|--------------------|---------|---------|
| ADNIMERGE       | 5.48    | 5.83               | 1.0     | 23.0    |
| Gene Expression | 0.0     | 0.0                | 0.0     | 0.0     |
| MRI             | 0.0     | 0.0                | 0.0     | 0.0     |

A – ADNIMERGE

| Domain          | Average | Standard Deviation | Minimum | Maximum |
|-----------------|---------|--------------------|---------|---------|
| ADNIMERGE       | 0.0     | 0.0                | 0.0     | 0.0     |
| Gene Expression | 0.0     | 0.0                | 0.0     | 0.0     |
| MRI             | 2457.08 | 4397.99            | 1.0     | 11957.0 |

C – MRI

| Domain          | Average | Standard Deviation | Minimum | Maximum |
|-----------------|---------|--------------------|---------|---------|
| ADNIMERGE       | 0.0     | 0.0                | 0.0     | 0.0     |
| Gene Expression | 1.55    | 0.94               | 1.0     | 7.0     |
| MRI             | 0.0     | 0.0                | 0.0     | 0.0     |

B – Gene Expression

| Domain          | Average | Standard Deviation | Minimum | Maximum |
|-----------------|---------|--------------------|---------|---------|
| ADNIMERGE       | 5.48    | 5.83               | 1.0     | 23.0    |
| Gene Expression | 1.55    | 0.94               | 1.0     | 7.0     |
| MRI             | 2457.08 | 4397.99            | 1.0     | 11957.0 |

D - Total

*Table S8 – Male Subset*

Table S9– Maximally-significant correlations with sufficient data to perform subsetting: Females

| Domain          | Average | Standard Deviation | Minimum | Maximum |
|-----------------|---------|--------------------|---------|---------|
| ADNIMERGE       | 5.48    | 5.83               | 1.0     | 23.0    |
| Gene Expression | 0.0     | 0.0                | 0.0     | 0.0     |
| MRI             | 0.0     | 0.0                | 0.0     | 0.0     |

A – ADNIMERGE

| Domain          | Average | Standard Deviation | Minimum | Maximum |
|-----------------|---------|--------------------|---------|---------|
| ADNIMERGE       | 0.0     | 0.0                | 0.0     | 0.0     |
| Gene Expression | 0.0     | 0.0                | 0.0     | 0.0     |
| MRI             | 2457.08 | 4397.99            | 1.0     | 11957.0 |

C – MRI

| Domain          | Average | Standard Deviation | Minimum | Maximum |
|-----------------|---------|--------------------|---------|---------|
| ADNIMERGE       | 0.0     | 0.0                | 0.0     | 0.0     |
| Gene Expression | 1.55    | 0.94               | 1.0     | 7.0     |
| MRI             | 0.0     | 0.0                | 0.0     | 0.0     |

B – Gene Expression

| Domain          | Average | Standard Deviation | Minimum | Maximum |
|-----------------|---------|--------------------|---------|---------|
| ADNIMERGE       | 5.48    | 5.83               | 1.0     | 23.0    |
| Gene Expression | 1.55    | 0.94               | 1.0     | 7.0     |
| MRI             | 2457.08 | 4397.99            | 1.0     | 11957.0 |

D - Total

*Table S9 – Female Subset*

Table S10– Maximally-significant correlations with sufficient data to perform subsetting: CDR=0

| Domain          | Average | Standard Deviation | Minimum | Maximum |
|-----------------|---------|--------------------|---------|---------|
| ADNIMERGE       | 5.48    | 5.83               | 1.0     | 23.0    |
| Gene Expression | 0.0     | 0.0                | 0.0     | 0.0     |
| MRI             | 0.0     | 0.0                | 0.0     | 0.0     |

A - ADNIMERGE

| Domain          | Average | Standard Deviation | Minimum | Maximum |
|-----------------|---------|--------------------|---------|---------|
| ADNIMERGE       | 0.0     | 0.0                | 0.0     | 0.0     |
| Gene Expression | 0.0     | 0.0                | 0.0     | 0.0     |
| MRI             | 2457.08 | 4397.99            | 1.0     | 11957.0 |

C – MRI

*Table S10 – CDR=0 Subset*

| Domain          | Average | Standard Deviation | Minimum | Maximum |
|-----------------|---------|--------------------|---------|---------|
| ADNIMERGE       | 0.0     | 0.0                | 0.0     | 0.0     |
| Gene Expression | 1.55    | 0.94               | 1.0     | 7.0     |
| MRI             | 0.0     | 0.0                | 0.0     | 0.0     |

B – Gene Expression

| Domain          | Average | Standard Deviation | Minimum | Maximum |
|-----------------|---------|--------------------|---------|---------|
| ADNIMERGE       | 5.48    | 5.83               | 1.0     | 23.0    |
| Gene Expression | 1.55    | 0.94               | 1.0     | 7.0     |
| MRI             | 2457.08 | 4397.99            | 1.0     | 11957.0 |

D - Total

Table S11– Maximally-significant correlations with sufficient data to perform subsetting: CDR=0.5

| Domain          | Average | Standard Deviation | Minimum | Maximum |
|-----------------|---------|--------------------|---------|---------|
| ADNIMERGE       | 5.48    | 5.83               | 1.0     | 23.0    |
| Gene Expression | 0.0     | 0.0                | 0.0     | 0.0     |
| MRI             | 0.0     | 0.0                | 0.0     | 0.0     |

A – ADNIMERGE

| Domain          | Average | Standard Deviation | Minimum | Maximum |
|-----------------|---------|--------------------|---------|---------|
| ADNIMERGE       | 0.0     | 0.0                | 0.0     | 0.0     |
| Gene Expression | 0.0     | 0.0                | 0.0     | 0.0     |
| MRI             | 2457.08 | 4397.99            | 1.0     | 11957.0 |

C – MRI

*Table S11 – CDR=0.5 Subset*

| Domain          | Average | Standard Deviation | Minimum | Maximum |
|-----------------|---------|--------------------|---------|---------|
| ADNIMERGE       | 0.0     | 0.0                | 0.0     | 0.0     |
| Gene Expression | 1.55    | 0.94               | 1.0     | 7.0     |
| MRI             | 0.0     | 0.0                | 0.0     | 0.0     |

B – Gene Expression

| Domain          | Average | Standard Deviation | Minimum | Maximum |
|-----------------|---------|--------------------|---------|---------|
| ADNIMERGE       | 5.48    | 5.83               | 1.0     | 23.0    |
| Gene Expression | 1.55    | 0.94               | 1.0     | 7.0     |
| MRI             | 2457.08 | 4397.99            | 1.0     | 11957.0 |

D - Total

Table S12– Maximally-significant correlations with sufficient data to perform subsetting: CDR≥1.0

| Domain          | Average | Standard Deviation | Minimum | Maximum |
|-----------------|---------|--------------------|---------|---------|
| ADNIMERGE       | 5.51    | 5.83               | 1.0     | 23.0    |
| Gene Expression | 0.0     | 0.0                | 0.0     | 0.0     |
| MRI             | 0.0     | 0.0                | 0.0     | 0.0     |

A – ADNIMERGE

| Domain          | Average | Standard Deviation | Minimum | Maximum |
|-----------------|---------|--------------------|---------|---------|
| ADNIMERGE       | 0.0     | 0.0                | 0.0     | 0.0     |
| Gene Expression | 0.0     | 0.0                | 0.0     | 0.0     |
| MRI             | 2457.08 | 4397.99            | 1.0     | 11957.0 |

C – MRI

*Table S12 – CDR≥1.0 Subset*

| Domain          | Average | Standard Deviation | Minimum | Maximum |
|-----------------|---------|--------------------|---------|---------|
| ADNIMERGE       | 0.0     | 0.0                | 0.0     | 0.0     |
| Gene Expression | 1.55    | 0.94               | 1.0     | 7.0     |
| MRI             | 0.0     | 0.0                | 0.0     | 0.0     |

B – Gene Expression

| Domain          | Average | Standard Deviation | Minimum | Maximum |
|-----------------|---------|--------------------|---------|---------|
| ADNIMERGE       | 5.51    | 5.83               | 1.0     | 23.0    |
| Gene Expression | 1.55    | 0.94               | 1.0     | 7.0     |
| MRI             | 2457.08 | 4397.99            | 1.0     | 11957.0 |

D - Total

Table S13 – Resource Usage

| Task                                                                            | CPU<br>Memory Per<br>Job<br>(Gigabytes) | GPU<br>Memory Per<br>Job<br>(Gigabytes) | Compute Time Per<br>Job<br>(days:hours:minutes) | Disc Space Per<br>Job<br>(Gigabytes) | Number<br>Of Jobs | Total Compute Time<br>(days:hours:minutes) | Total Disc<br>Space<br>(Gigabytes) |
|---------------------------------------------------------------------------------|-----------------------------------------|-----------------------------------------|-------------------------------------------------|--------------------------------------|-------------------|--------------------------------------------|------------------------------------|
| Getting The Known Values From ADNIMERGE                                         | 3                                       | NA                                      | 00:12:20                                        | 0.071                                | 1                 | NA                                         | NA                                 |
| Collecting The Medical Images Of Intersecting Patient IDs                       | 32                                      | NA                                      | 00:01:02                                        | 20                                   | 1                 | NA                                         | NA                                 |
| Converting The DICOM Images To PNG Format                                       | 32                                      | NA                                      | 00:12:25                                        | 7.9                                  | 1                 | NA                                         | NA                                 |
| Processing The PNG Images And Converting Them To TXT Files                      | 64                                      | NA                                      | 00:01:14                                        | 36                                   | 1                 | NA                                         | NA                                 |
| Training The Autoencoders                                                       | 16                                      | 16                                      | 00:16:17                                        | 1.4                                  | 124               | 84:02:57                                   | 164                                |
| Creating The MRI Domain                                                         | 128                                     | 16                                      | 00:01:53                                        | 11.015                               | 1                 | NA                                         | NA                                 |
| Completing The ADNIMERGE Data Domain                                            | 64                                      | NA                                      | 00:00:24                                        | 0.014                                | 1                 | NA                                         | NA                                 |
| Combining The Three Domains Into The Final Data Set                             | 1600                                    | NA                                      | 00:03:26                                        | 12.016                               | 1                 | NA                                         | NA                                 |
| Correlation Analysis On The Entire Data Set                                     | 128                                     | NA                                      | 00:08:53                                        | 0.4051                               | 6,418             | 2375:13:13                                 | 2,600                              |
| Equalize The Size Of The Files Containing The Comparisons                       | 128                                     | NA                                      | 05:10:25                                        | 2,600                                | 1                 | NA                                         | NA                                 |
| Getting The Significant Comparison Frequencies For Features By Bonferroni Alpha | 1600                                    | NA                                      | 02:18:19                                        | 0.04                                 | 1                 | NA                                         | NA                                 |
| Creating The Significant Comparison Frequencies Table For Bonferroni Alpha      | 16                                      | NA                                      | 01:10:37                                        | 0.027                                | 1                 | NA                                         | NA                                 |
| Filtering Comparisons By Maximum Alpha                                          | 16                                      | NA                                      | 00:00:08                                        | 0.0049                               | 853               | 4:15:57                                    | 4.2                                |
| Re-Run Only The Most Significant Comparisons On The Subsets                     | 16                                      | NA                                      | 00:00:07                                        | 0.0014                               | 14,780            | 66:22:33                                   | 21                                 |
